# Supplementary material for: Assessment of reporting quality in randomised controlled clinical trial abstracts of dental implantology published from 2014 to 2016
Source: PubMed Central journal article supplement — BMJ Open. 2021 Aug 13;11(8):e045372. doi: 10.1136/bmjopen-2020-045372 (PMC8365792; doi:10.1136/bmjopen-2020-045372), 2021-08-13
Supplement: bmjopen-2020-045372.draft_revisions.pdf [file bmjopen-2020-045372.draft_revisions.pdf]

# BMJ Open

BMJ Open is committed to open peer review. As part of this commitment we make the peer review history of every article we publish publicly available.

When an article is published we post the peer reviewers' comments and the authors' responses online. We also post the versions of the paper that were used during peer review. These are the versions that the peer review comments apply to.

The versions of the paper that follow are the versions that were submitted during the peer review process. They are not the versions of record or the final published versions. They should not be cited or distributed as the published version of this manuscript.

BMJ Open is an open access journal and the full, final, typeset and author-corrected version of record of the manuscript is available on our site with no access controls, subscription charges or pay-per-view fees (<http://bmjopen.bmj.com>).

If you have any questions on BMJ Open's open peer review process please email [info.bmjopen@bmj.com](mailto:info.bmjopen@bmj.com)

# BMJ Open

## Assessment of reporting quality in randomised controlled clinical trial abstracts of dental implantology published in the period 2014 – 2016.

|                               |                                                                                                                                                                                                                                                                                                                                                                                                                                                                                                                                                                                                                |
|-------------------------------|----------------------------------------------------------------------------------------------------------------------------------------------------------------------------------------------------------------------------------------------------------------------------------------------------------------------------------------------------------------------------------------------------------------------------------------------------------------------------------------------------------------------------------------------------------------------------------------------------------------|
| Journal:                      | <i>BMJ Open</i>                                                                                                                                                                                                                                                                                                                                                                                                                                                                                                                                                                                                |
| Manuscript ID                 | bmjopen-2020-045372                                                                                                                                                                                                                                                                                                                                                                                                                                                                                                                                                                                            |
| Article Type:                 | Original research                                                                                                                                                                                                                                                                                                                                                                                                                                                                                                                                                                                              |
| Date Submitted by the Author: | 01-Oct-2020                                                                                                                                                                                                                                                                                                                                                                                                                                                                                                                                                                                                    |
| Complete List of Authors:     | Knippschild, Stephanie; University Witten Herdecke Faculty of Health, Institute for Medical Biometry and Epidemiology<br>Loddenkemper, Jeremias; University Witten Herdecke Faculty of Health, Institute for Medical Biometry and Epidemiology<br>Tulka, Sabrina; University Witten Herdecke Faculty of Health, Institute for Medical Biometry and Epidemiology,<br>Loddenkemper, Christine; University Witten Herdecke Faculty of Health, Institute for Medical Biometry and Epidemiology<br>Baulig, Christine; University Witten Herdecke Faculty of Health, Institute for Medical Biometry and Epidemiology |
| Keywords:                     | ORAL & MAXILLOFACIAL SURGERY, ORAL MEDICINE, STATISTICS & RESEARCH METHODS                                                                                                                                                                                                                                                                                                                                                                                                                                                                                                                                     |
|                               |                                                                                                                                                                                                                                                                                                                                                                                                                                                                                                                                                                                                                |

SCHOLARONE™  
Manuscripts

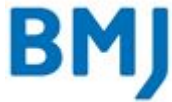

I, the Submitting Author has the right to grant and does grant on behalf of all authors of the Work (as defined in the below author licence), an exclusive licence and/or a non-exclusive licence for contributions from authors who are: i) UK Crown employees; ii) where BMJ has agreed a CC-BY licence shall apply, and/or iii) in accordance with the terms applicable for US Federal Government officers or employees acting as part of their official duties; on a worldwide, perpetual, irrevocable, royalty-free basis to BMJ Publishing Group Ltd ("BMJ") its licensees and where the relevant Journal is co-owned by BMJ to the co-owners of the Journal, to publish the Work in this journal and any other BMJ products and to exploit all rights, as set out in our [licence](#).

The Submitting Author accepts and understands that any supply made under these terms is made by BMJ to the Submitting Author unless you are acting as an employee on behalf of your employer or a postgraduate student of an affiliated institution which is paying any applicable article publishing charge ("APC") for Open Access articles. Where the Submitting Author wishes to make the Work available on an Open Access basis (and intends to pay the relevant APC), the terms of reuse of such Open Access shall be governed by a Creative Commons licence – details of these licences and which [Creative Commons](#) licence will apply to this Work are set out in our licence referred to above.

Other than as permitted in any relevant BMJ Author's Self Archiving Policies, I confirm this Work has not been accepted for publication elsewhere, is not being considered for publication elsewhere and does not duplicate material already published. I confirm all authors consent to publication of this Work and authorise the granting of this licence.

1  
2  
3 **Assessment of reporting quality in randomised controlled clinical trial abstracts**  
4  
5 **of dental implantology published in the period 2014 – 2016**  
6  
7  
8  
9

10 **Short title:** Reporting Quality in RCT Abstracts of dental implantology  
11  
12

13  
14 Stephanie Knippschild<sup>1</sup>, Jeremias Loddenkemper<sup>1</sup>, Sabrina Tulka<sup>1</sup>, Christine  
15  
16 Loddenkemper<sup>1</sup>, Christine Baulig<sup>1</sup>  
17  
18  
19

20  
21 **Affiliation of all authors:**  
22

23  
24 <sup>1</sup>Institute for Medical Biometry and Epidemiology  
25  
26 Faculty of Health, Witten/Herdecke University  
27  
28 Alfred Herrhausen Straße 50, D-58448 Witten (Germany)  
29  
30

31  
32  
33 **Corresponding author:**  
34

35 Dr. rer. medic. Stephanie Knippschild  
36  
37 Institute for Medical Biometry and Epidemiology  
38  
39 Faculty of Health, Witten/Herdecke University  
40  
41 Alfred Herrhausen Straße 50, D-58448 Witten (Germany)  
42  
43 Phone: ++ 49 (0)2302 926 763  
44  
45 Fax: ++ 49 (0)2302 926 44785  
46  
47 [stephanie.knippschild@uni-wh.de](mailto:stephanie.knippschild@uni-wh.de)  
48  
49  
50  
51

52  
53 **Word count:** 3821  
54  
55

56  
57  
58 **Keywords:** quality, abstracts, CONSORT, CONSORT-A  
59  
60

1  
2  
3 **Objectives:** Access to full texts of randomised controlled clinical trials (RCTs) is often  
4 limited, so that the brief summaries of studies play a pivotal role. In 2008 a checklist  
5 was provided to ensure transparency and completeness of abstracts. The question is  
6 to what extent the CONSORT criteria for abstracts (CONSORT-A) are considered in  
7 the preparation of RCT publications thereof.  
8  
9

10  
11  
12  
13  
14  
15 **Primary Endpoint:** Assessment of means of the percentage share of compliance with  
16 the 16 CONSORT-A criteria per study.  
17  
18

19  
20 **Material and methods:** This study is based on a full survey (212 RCT-abstracts in  
21 dental implantology, publication period 2014 – 2016, 45 journals, median impact factor  
22 2.328). Apart from merely documenting “adherence” to criteria, the authors also  
23 assessed “correct implementation” of requested information where possible. Collection  
24 of data was performed independently by two dentists and final consensus. The primary  
25 endpoint was evaluated by medians and quartiles. Additionally a Poisson regression  
26 was conducted to detect influencing factors.  
27  
28  
29  
30  
31  
32  
33  
34  
35

36  
37 **Results:** A median of 50% [Q1-Q3: 44%-63%] was documented for the 16 criteria  
38 listed in the CONSORT-A statement. Nine of the 16 criteria were considered in less  
39 than 50% of abstracts. “Correct implementation” was attested for a median value of  
40 43% (Q1-Q3: 31%-50%) of criteria. An additional application of Poisson regression  
41 revealed that the number of words used had a locally significant impact on the number  
42 of reported CONSORT criteria for abstracts (IRR 1.001, 95%CI 1.001 to 1.002).  
43  
44  
45  
46  
47  
48  
49

50  
51 **Conclusion:** Transparent and complete reporting in abstracts appears problematic.  
52 Limited word count seems to result in a reduction of necessary information. As current  
53 scientific knowledge is often not readily available in the form of publications, abstracts  
54 constitute the primary basis for decision-making in clinical practice and research. This  
55  
56  
57  
58  
59  
60

1  
2  
3 is why journals should refrain from limiting the number of words too strictly in order to  
4  
5 facilitate comprehensive reporting in abstracts.  
6  
7  
8  
9

## 10 11 **Strengths and limitations of this study**

### 12 13 14 **1. Literature search**

15  
16 Our search was performed in one electronic database – PubMed – because it  
17  
18 comprises more than 30 million citations for biomedical literature from MEDLINE and  
19  
20 is declared the world's largest and most important medical bibliographic database.

### 21 22 **2. Data extraction**

23  
24 Two dentists reviewed the abstracts simultaneously and independently from each  
25  
26 other; the final set of data was drawn up by means of consent.

### 27 28 **3. Reporting quality by accessing the adherence and correct implementation of the CONSORT statement.**

29  
30 This approach - for accessing the reporting quality - is new in the field of dental  
31  
32 implantology; apart from merely documenting “adherence” to criteria, the authors also  
33  
34 assessed “correct implementation” of requested information.  
35  
36

## 37 38 **Funding**

39  
40 This research received no specific grant from any funding agency in the public, commercial  
41  
42 or not-for-profit sectors.  
43  
44  
45  
46  
47  
48  
49  
50  
51  
52  
53  
54  
55  
56  
57  
58  
59  
60

## **Assessment of reporting quality in randomised controlled clinical trial abstracts of dental implantology published in the period 2014 – 2016**

### **Background and Objective**

Transparent and comprehensive reporting forms the basis for the evaluation and interpretation of published scientific findings. The EQUATOR network currently provides a total of 425 guidelines on reporting in health research to improve the quality of reporting in health care studies,[1].

The CONSORT statement contains recommendations for reporting controlled clinical studies (RCTs) which present the highest evidence level (Ib) and serve as a basis for recommendations and therapy decisions derived therefrom in daily clinical routines as well as evidence-based practice. The CONSORT group has developed guidelines for a variety of study designs, interventions and data and makes checklists available to authors to be used in the preparation of publications,[2]. A specific checklist to generate abstracts has been available since 2008, as this part of a publication plays a key role: researchers and physicians worldwide use information from abstracts of publications in order to assess the relevance and further exploitation of a scientific paper. An abstract, i.e. a publication in miniature format, should therefore convey all necessary information on a scientific study.

A look at the current literature reveals differences between published abstracts in terms of completeness, structure and scope, despite existing and freely available guidelines. Reporting is frequently non-transparent and incomplete, which inevitably leads to two problems:

1  
2  
3  
4  
5  
6  
7  
8  
9  
10  
11  
12  
13  
14  
15  
16  
17  
18  
19  
20  
21  
22  
23  
24  
25  
26  
27  
28  
29  
30  
31  
32  
33  
34  
35  
36  
37  
38  
39  
40  
41  
42  
43  
44  
45  
46  
47  
48  
49  
50  
51  
52  
53  
54  
55  
56  
57  
58  
59  
60

1. **Fragmented and incomplete abstract reporting of study results prevents decision-making on therapies in daily clinical routines.**

Due to increasing time constraints in hospitals and a rapidly growing number of published study results, many interested individuals have only time to read the abstracts,[3]. On this basis they need to decide for or against the inspection or acquisition of full texts, and possibly for or against a therapy.

In regions with fewer resources in health care in particular, limited and chargeable access to full texts forces medical staff to make treatment decisions exclusively on the basis of abstracts. This involves a high risk of mistakes with possibly far-reaching consequences for patients.

More specifically, information from study reports on traditional Chinese medicine appears to be available from abstracts exclusively in most cases, since full texts are primarily published in Chinese in this discipline,[4].

2. **Fragmented and incomplete abstract reporting of study results complicates the compilation of evidence-based information in medicine.**

In projects with moderate or no funding in particular, research of the literature is followed by an abstract screening to identify relevant literature and keep costs for the procurement of literature to a minimum. Non-transparent or fragmentary reporting in abstracts entails the risk that relevant study reports will not be considered since presentation of results may be incomplete, incorrect or selective. The effect is especially critical for the drafting of recommendations, where RCT reporting is used for an evidence-based presentation of results. As a consequence of unclear and incomplete reporting the possibility cannot be



1  
2  
3 excluded that articles of importance to the formulation of therapeutic guidelines  
4  
5 are not identified and therefore not considered.  
6  
7

8  
9 These problems are widespread in publications from various areas of medical  
10 indication,[5-8]. No results have been presented for the field of dental implantology to  
11 date; this study therefore aimed to identify the extent to which authors in the field  
12 comply with recommendations provided in the CONSORT statement for the  
13 compilation of transparent and complete abstracts. The objective was to check RCT  
14 publications in dental implantology for information as requested in the CONSORT  
15 statement for abstracts.  
16  
17  
18  
19  
20  
21  
22  
23  
24  
25  
26  
27

## 28 **Material & Methods**

29  
30 The authors of this study examined abstracts of published study reports in dental  
31 implantology for compliance with 16 criteria recommended by the CONSORT-A,[9].  
32  
33 The objective was to identify the degree – in per cent and per study – to which all  
34 criteria requested in CONSORT-A were adhered to (primary endpoint). Secondary  
35 research questions served to identify possible factors via regression analysis which  
36 might result in a better implementation of CONSORT criteria. These criteria were in  
37 addition assessed in terms of their correct and meaningful documentation. Assessment  
38 was conducted in two steps: For an assessment of the “degree of adherence I”, the  
39 focus was exclusively on the documentation (retrievability) of information in abstracts  
40 as requested by CONSORT-A. For an assessment of the degree of adherence II,  
41 accuracy and completeness were evaluated. It was only possible to collect this  
42 information for 6 out of 16 criteria since an assessment of correctness would not have  
43 made sense for the remaining criteria. Assessment of the “degree of adherence II” is  
44 based on requirements defined in the CONSORT-A statement,[9] as well as on  
45  
46  
47  
48  
49  
50  
51  
52  
53  
54  
55  
56  
57  
58  
59  
60

1  
2  
3 information required in “Explanation and Elaboration”,[10]. The latter provides a clear  
4  
5 description of reporting on individual criteria in several subsections. An assessment in  
6  
7 terms of requirements for degree of adherence it was possible for six criteria (see  
8  
9 supplementary table 1).

10  
11  
12 A literature search of the publication period 01/2014 to 12/2016 via the search engine  
13  
14 PubMed of the medical database MEDLINE formed the basis for the analysis. For this  
15  
16 purpose, the keywords “dental implantation”, “dental implant” and “tooth artificial” were  
17  
18 combined with the logical operator OR. The type of study was restricted to randomised  
19  
20 and controlled clinical trials (RCTs) (supplementary table 2). Electronic search yielded  
21  
22 a data pool of 262 reports, 40 abstracts of which had to be excluded after a first  
23  
24 screening due to a mismatch in disciplines. Ten further abstracts were excluded  
25  
26 because the publications in question did not report clinical studies. As a result, a total  
27  
28 of 212 abstracts of RCT publications (see Fig. 1) remained as the basis for this study.  
29  
30  
31 The software programme Excel,[11] was used to compile data, and the data mask was  
32  
33 generated on the basis of the CONSORT statement for abstracts,[9]. At the start of the  
34  
35 project, a tool to evaluate abstract quality was available from a preceding study,[6],  
36  
37 which the planners of the study had to slightly adapt and extend for the purposes of  
38  
39 the new area of indication. All 16 CONSORT-A criteria were included in the data  
40  
41 compilation and analysis. General information on each publication was documented to  
42  
43 facilitate a clear classification of reports at a later time, as well as additional data to be  
44  
45 examined for potential impact on reporting quality (year of publication, “structured” or  
46  
47 “unstructured” presentation of abstract, number of patients included, word count and  
48  
49 impact factor of the respective journal). Two dentists reviewed the abstracts  
50  
51 simultaneously and independently from each other. The final set of data was drawn up  
52  
53 by means of consent (JL, CL). Data analysis was performed using the software  
54  
55 programme SPSS Statistics 24 (SK, CB). The authors determined relative frequencies  
56  
57  
58  
59  
60

1  
2  
3 and interquartile ranges for study-related implementation rates and for the  
4  
5 implementation of individual criteria. Results at primary endpoint were depicted in the  
6  
7 form of boxplots. Criteria-related frequencies were illustrated with barcharts,[11].  
8  
9

10  
11  
12 Possible factors influencing the quality of abstracts were identified by means of an  
13  
14 additional explorative data analysis via Poisson regression (ST). Based on the Akaike  
15  
16 information criterion (AIC), the aim was to identify the model with the highest predictive  
17  
18 quality for the incidence of endpoints by means of a Poisson regression with backward  
19  
20 variable selection. Incidence rate ratios (IRR) including 95% confidence interval and  
21  
22 respective p-value determined via Wald test were used to describe the influence. Year  
23  
24 of publication (reference: 2014), presence of a structured abstract (reference: no),  
25  
26 number of patients analysed, impact factor and word count were examined as potential  
27  
28 influencing factors. The analysis was conducted using the software programme R (R  
29  
30 Core Team, 2015).  
31  
32  
33  
34  
35  
36  
37  
38

### 39 **Patient and Public Involvement:**

40 No patient involved  
41  
42  
43

## 44 **Results**

### 45 **General study characteristics and journals**

46  
47 The analysis included RCT abstracts from 45 journals (see supplementary table 3) with  
48  
49 a median IF of 2,3280 (min. 0, max. 5,62). The journals “European Journal of  
50  
51 Implantology” (36 of 212 abstracts; 17%) and “Clinical oral implants research” (36 of  
52  
53 212 abstracts; 17%) accounted for about one third. Table 1 shows the general study  
54  
55 characteristics for the data pool evaluated. A major part of information was available  
56  
57 in a structured form (174/212; 82%) with a median of 258 words (min. 94 words,[12]  
58  
59  
60

and max. 659 words,[13]). The abstracts reported case numbers from published studies between 10,[14-16] and 360,[17]. The median number of study participants was 36.

| Study characteristics             | Frequencies                                                |           |
|-----------------------------------|------------------------------------------------------------|-----------|
| Form of abstract                  | structured                                                 | 174 (82%) |
|                                   | unstructured                                               | 38 (18%)  |
| Year of publication               | 2014                                                       | 101 (48%) |
|                                   | 2015                                                       | 74 (35%)  |
|                                   | 2016                                                       | 37 (17%)  |
| Journals                          | European Journal of Oral Implantology                      | 36 (17%)  |
|                                   | Clinical oral implants research                            | 36 (17%)  |
|                                   | The International journal of oral & maxillofacial implants | 23 (11%)  |
|                                   | Clinical implant dentistry and related research            | 22 (11%)  |
|                                   | other                                                      | 95 (45%)  |
| Provenance                        | Europe                                                     | 70 (33%)  |
|                                   | America                                                    | 21 (10%)  |
|                                   | Africa                                                     | 6 (3%)    |
|                                   | Asia                                                       | 35 (17%)  |
|                                   | Not specified                                              | 80 (38%)  |
| Word count (median)               | 258 [Min. 94; Max. 659]                                    |           |
| Number of cases analysed (median) | 36 [Min. 10; Max. 360]                                     |           |
| Impact factor (median)            | 2,3280 [Min. 0; Max. 5,62]                                 |           |

Table 1: Study characteristics for 212 RCT abstracts of implantology in terms of frequency [N] and relative frequency (%).

### Implementation rate per study

The studies under consideration showed a median implementation of CONSORT-A recommendations (degree of adherence I) of 50% (Q1-Q3 43,8% to 62,5%) per abstract, whereby eight out of 16 criteria were documented (min. 7, max. 14 criteria); see also supplementary figure 1. The criterion with the highest percentage of documentation was “intervention” (100%). A documentation of less than 10 % was found for “trial registration” and “funding” (see Table 2).

| CONSORT criterion                                 | Implementation N (%)<br>Degree of adherence I | Implementation N (%)<br>Degree of adherence II |
|---------------------------------------------------|-----------------------------------------------|------------------------------------------------|
| Identification as a randomised trial in the title | 95 (45)                                       | 95 (45)*                                       |
| Trial design                                      | 66 (31)                                       | 66 (31) *                                      |
| Participant characteristics                       | 154 (73)                                      | 154 (73) *                                     |
| Interventions                                     | 212 (100)                                     | 200 (94)                                       |
| Objective                                         | 209 (99)                                      | 209 (99) *                                     |
| Definition primary endpoint                       | 198 (93)                                      | 117 (55)                                       |
| Randomisation                                     | 35 (17)                                       | 13 (6)                                         |
| Blinding                                          | 41 (19)                                       | 21 (10)                                        |
| Numbers randomised                                | 97 (46)                                       | 97 (46) *                                      |
| Recruitment                                       | 196 (93)                                      | 196 (93) *                                     |
| Numbers analysed                                  | 57 (27)                                       | 57 (27)*                                       |
| Results of Outcome                                | 207 (98)                                      | 133 (63)                                       |
| Harms                                             | 23 (11)                                       | 23 (11) *                                      |
| Conclusion                                        | 204 (96)                                      | 47 (22)                                        |
| Trial Registration                                | 10 (5)                                        | 10 (5) *                                       |
| Funding                                           | 8 (4)                                         | 8 (4) *                                        |
| <b>Total</b>                                      |                                               |                                                |

Table 2: Implementation N [%] of CONSORT criteria for abstracts in 212 reports of published RCTs in the field of implantology. Presentation of degree of adherence I (information given in the abstract) and degree of adherence II (correct documentation in accordance with CONSORT-A). \* Variables without formal degree of adherence II.

In terms of correct implementation (degree of adherence II), a median implementation of 40,6% (6.5 criteria) was found with an interquartile range of 31,3% to 50,0%. One abstract,[18] revealed the lowest implementation with only the criterion “Objective” (6,25%), whereas Esposito et al., 2014 documented a maximum number of 13 criteria (81,25%).

For the criteria “randomisation” (documentation 17%, correct implementation 6%) and “conclusion” (documentation 96%, correct implementation 22%), the authors found a decrease of  $\geq 50\%$  in the implementation rate from degree of adherence I to degree of adherence II (see Table 2).

## Implementation rates per criterion

### General criteria

1  
2  
3 From 212 abstracts under consideration, 45% mentioned RCT as study design in the  
4 title of the study (95/212). 31% gave a more detailed description of the study design  
5 such as parallel group study, blinded study, placebo-controlled study (66/212).  
6  
7  
8  
9

### 10 11 12 *Methods*

13  
14 The “aim of the study” was documented in 99% of examined abstracts (209/212).  
15 Information on “primary endpoint” was given in 93% (198/212); this information was,  
16 however, clearly defined in only 55% (117/212), including specification of the  
17 measurement variable. “Eligibility criteria für participants and the settings“ were found  
18 in 73% (154/212) of abstracts, and a complete documentation of the “intervention for  
19 each group” in all 212 abstracts (100%). 94% (200/212) reported an exact  
20 dose/therapy for each intervention group. Random allocation of participants to the  
21 intervention group was documented in 17% (35/212) of cases; only 6% (13/212) of  
22 abstracts contained data on generation of the random sequence and on  
23 implementation. 19% (41/212) of abstracts mentioned blinding prior to the study; 10%  
24 (21/212) indicated the blinded groups of participants.  
25  
26  
27  
28  
29  
30  
31  
32  
33  
34  
35  
36  
37  
38  
39  
40  
41

### 42 *Results*

43  
44 In terms of result presentation, 93% (196/212) of abstracts provided information on the  
45 current status of the study (study completed, interim analysis after xy years). The  
46 number of randomised participants was given in 46% (97/212) of abstracts, and of  
47 analysed participants in 27% (57/212). 98% (207/212) of abstracts under consideration  
48 reported results at the primary endpoint; but only 63% (133/212) of abstracts contained  
49 a precise effect size. 11% (23/212) of examined RCT abstracts documented major  
50 (significant) harms. 96% (204/212) provided a general summary of results; only 22%  
51 (47/212), however, described the strengths and deficits of the respective study.  
52  
53  
54  
55  
56  
57  
58  
59  
60

1  
2  
3 Registration was documented in 5% (10/212) of abstracts, and information on funding  
4  
5 in 4% (8/212).  
6  
7  
8  
9

10 The additional explorative analysis by means of Poisson regression included 199 out  
11 of 212 abstracts, since 13 abstracts did not provide information on all potential  
12 influencing factors. For both degrees of adherence – I and II – the number of words  
13 used was shown to have a locally significant impact on the number of reported  
14 CONSORT abstract criteria (degree of adherence I: IRR 1.001, 95% CI 1.001 to 1.002;  
15 degree of adherence II: IRR 1.002, 95%CI 1.001 to 1.003). The percentage of  
16 explained variance according to Nagelkerke  $R^2$  was 14% and 21% respectively. The  
17 other possible influencing variables – year of publication, presence of a structured  
18 abstract, number of patients included and impact factor – were not selected in the  
19 the backward variable selection via AIC and had no significant influence on the number  
20 of reported CONSORT-A criteria.  
21  
22  
23  
24  
25  
26  
27  
28  
29  
30  
31  
32  
33  
34  
35  
36  
37

## 38 Discussion

39  
40 This study examined the degree to which recommendations of the CONSORT  
41 statement for abstracts were implemented in trial publications on dental implantology.  
42  
43 212 abstracts from the period 2014 to 2016 showed a median documentation of the  
44 required criteria (degree of adherence I) of 50%. With the focus on a “correct”  
45 compliance with the requirements of the statement (in this context: degree of  
46 adherence II), adherence declined to 40,6% (see Fig. 2 and Table 2).  
47  
48  
49  
50  
51  
52  
53  
54  
55

56 A comparison of all criteria revealed that the two criteria “funding” and “trial registration”  
57 in particular were documented rarely (5% and 4% respectively). In general, journal  
58 editors request these details separately, and they are mentioned in the publication but  
59  
60

1  
2  
3 not in the abstract. In addition, the content of abstracts is often massively reduced by  
4 word count limitations requested by the publishers. A poisson regression analysis  
5 conducted for the purposes of this study showed that word count limits were  
6 responsible for lesser reporting quality or missing details in abstracts (IRR 1.001, 95%  
7 CI 1.001 to 1.002). The influence of the number of words used in the abstract had  
8 already been documented in a previous study by Baulig et al. (N=136) (Poisson  
9 regression based IRR 1.002, 95% CI 1.001 to 1.003). This previous study explored the  
10 abstract quality in ophthalmology RCTs for the indication of age-related macular  
11 degeneration. The analysis revealed a median implementation of seven criteria (95%  
12 CI 7 to 8),[6]. Results are similar to those found in the present study in the field of  
13 dental implantology.

14  
15 Notwithstanding any word count limitations, minor additional information (such as  
16 registration ID, identification as RCT in the title, specification of patient numbers at  
17 randomisation or analysis) can be included in the text (e.g. numbers in brackets)  
18 without need for considerably more words. Such inclusions provide important  
19 information on indexing or for the benefit of readers and improve the transparency  
20 required for abstracts. A publication by Berwanger et al.,[19] offers an excellent  
21 template for transparent and comprehensive reporting in abstracts even if the word  
22 count has been restricted.

23  
24 Assessment of the documentation of CONSORT-A criteria in this paper is based on  
25 abstracts exclusively. Original texts (full texts) or information provided outside the  
26 abstract text were not explored and not taken into consideration. Since the two criteria  
27 “funding” and “trial registration” need not necessarily be placed in the abstract and a  
28 subjective presentation of the implementation ratio might be the consequence, to the  
29 detriment of the authors’ duty of documentation, an additional evaluation of data on the  
30 basis of only 14 criteria seemed advisable, to the exclusion of “funding” and “trial



1  
2  
3 registration". This further evaluation yielded a somewhat higher "implementation ratio"  
4  
5 for degree of adherence I of 57,1% with an interquartile range of 50,5% to 71,4% (see  
6  
7 supplementary Fig. 2). For degree of adherence II, the authors found a still reduced  
8  
9 implementation ratio of 42,9% (Q1-Q3; 35,7% - 57,1%). A median of eight criteria  
10  
11 (interquartile range 7-10 criteria) was documented, and six criteria were correctly  
12  
13 implemented (interquartile range 5-8 criteria). It was, however, obvious from both data  
14  
15 pools (14 vs. 16 criteria) that a far smaller number of CONSORT-A criteria was  
16  
17 identified as fulfilled if correct implementation was explored in addition to mere  
18  
19 documentation (see supplementary Fig. 3).  
20  
21  
22  
23  
24  
25

26 An analysis of data for 14 CONSORT-A criteria by means of Poisson regression also  
27  
28 revealed a locally significant influence of the abstract word count on the quality of  
29  
30 abstracts (degree of adherence I: IRR 1.001, 95% CI 1.001 to 1.002,  $p < 0,001$ ; degree  
31  
32 of adherence II: IRR 1.002, 95% CI 1.001 to 1.003,  $p < 0,001$ ). The percentage of  
33  
34 explained variance according to Nagelkerke  $R^2$  was 13% and 20% respectively. Other  
35  
36 possible influencing variables, i.e. year of publication, presence of a structured  
37  
38 abstract, number of patients included and impact factor, were again not selected in the  
39  
40 backward selection via AIC and had no significant influence on the number of  
41  
42 CONSORT-A criteria reported in the abstracts under consideration.  
43  
44  
45  
46  
47  
48

49 Findings from a doctoral project were presented in the context of the study; the project  
50  
51 in question did not receive any financial support or assistance. Literature search was  
52  
53 therefore exclusively conducted by means of the internet based literature database  
54  
55 PubMed with a total of over 30 million quotations for biomedical literature from  
56  
57 MEDLINE, Life-Science journals and online books which was directly available free of  
58  
59 charge to all researchers involved. When interpreting the findings of this study, readers  
60

1  
2  
3 should therefore be aware that inclusion of further databases might lead to a bias of  
4  
5 results.  
6

7  
8 In order to minimise bias on the part of evaluators, two researchers/physicians  
9  
10 performed the analysis in parallel and independently from each other. Abstract  
11  
12 evaluation was based on .txt files which were generated directly in PubMed after  
13  
14 completed search operation. This strategy ensured that all abstracts were available in  
15  
16 the same visual form, and ruled out any influence due to the graphic presentation of  
17  
18 abstracts. However, evaluators were not blinded with respect to journals, authors and  
19  
20 publication periods, so that a possible assessor bias can be assumed.  
21  
22

23  
24  
25  
26 The calculation of Cohen's Kappa shows a high conformity between both assessors  
27  
28 for eight out of 16 criteria (see supplementary table 4). With a focus on the percentage  
29  
30 of correlation, the lowest degree of conformity between assessors was identified for  
31  
32 the criterion "harms" (62%;  $\kappa=0,041$ ). Information on this aspect may possibly be more  
33  
34 or less deduced from the abstract (if one reads between the lines), and is not always  
35  
36 explicitly presented as health disadvantages for patients. An evaluation of abstract  
37  
38 quality performed in a previous study in the field of ophthalmology (Baulig et al., 2018)  
39  
40 served as a basis for the present study in terms of assessment tool, evaluation  
41  
42 procedure and evaluation, so that no study protocol was deemed necessary for the  
43  
44 present study.  
45  
46  
47  
48  
49

50  
51 Several publications from other areas of indication with similar research questions  
52  
53 confirmed our results for the general implementation of criteria. Gallo et al. analysed  
54  
55 126 abstracts from the period 2011 to 2018 for the rate of implication. The authors  
56  
57 found that in general seven criteria (SD  $\pm 2$ ) were considered per publication. "Trial  
58  
59 registration", "method of randomisation" and "source of trial funding" were documented  
60

1  
2  
3 with a frequency of less than 5%,[20]. Chow et al. report on the adherence to  
4 CONSORT criteria in 395 abstracts in the field of anaesthesiology. Their study  
5 documented that 75% of these abstracts from RCTs published in 2016 met less than  
6 half of the 16 criteria. In line with the present study, their examination revealed that not  
7 a single one of the publications included took all 16 CONSORT criteria for abstracts  
8 into consideration. An implication rate of < 50% was found for the following criteria:  
9 “designation in the title”, “study design”, “baseline data”, “objective”, “randomisation”,  
10 “blinding” “number of randomised participants”, “outcome”, “registration” and  
11 “funding”,[21]. Speich et al. explored the abstract quality in published study reports  
12 from the field of surgery (2014 – 2016),[22]. They found a general implementation of  
13 eight criteria (95%- KI 7.83 - 8.39), whereby “randomisation”, “blinding” and “funding”  
14 were considered in less than 20%.

15  
16  
17  
18  
19  
20  
21  
22  
23  
24  
25  
26  
27  
28  
29  
30  
31  
32  
33 The above-mentioned reports are consistent with the present study, in terms of the low  
34 number of criteria met as well as of those criteria for which the lowest degree of  
35 adherence was found. The authors criticise in particular the documentation of  
36 “randomisation”, “blinding”, and “number of randomised/analysed participants”. The  
37 section “Explorations & Elaborations” describes in detail in which way the 16 required  
38 CONSORT-A criteria contribute to the completeness and sufficient transparency of an  
39 abstract, whereby the relevance of individual criteria and their processing is not under  
40 discussion in this context. The literature gives no clues as to a possibly bigger or  
41 smaller impact of criteria on reporting quality. However, further studies should consider  
42 a weighting of required criteria, with the possible consequence that future studies can  
43 present the degree of implementation in a more objective manner.

44  
45  
46  
47  
48  
49  
50  
51  
52  
53  
54  
55  
56  
57  
58  
59  
60  
61  
62  
63  
64  
65  
66  
67  
68  
69  
70  
71  
72  
73  
74  
75  
76  
77  
78  
79  
80  
81  
82  
83  
84  
85  
86  
87  
88  
89  
90  
91  
92  
93  
94  
95  
96  
97  
98  
99  
100  
101  
102  
103  
104  
105  
106  
107  
108  
109  
110  
111  
112  
113  
114  
115  
116  
117  
118  
119  
120  
121  
122  
123  
124  
125  
126  
127  
128  
129  
130  
131  
132  
133  
134  
135  
136  
137  
138  
139  
140  
141  
142  
143  
144  
145  
146  
147  
148  
149  
150  
151  
152  
153  
154  
155  
156  
157  
158  
159  
160  
161  
162  
163  
164  
165  
166  
167  
168  
169  
170  
171  
172  
173  
174  
175  
176  
177  
178  
179  
180  
181  
182  
183  
184  
185  
186  
187  
188  
189  
190  
191  
192  
193  
194  
195  
196  
197  
198  
199  
200  
201  
202  
203  
204  
205  
206  
207  
208  
209  
210  
211  
212  
213  
214  
215  
216  
217  
218  
219  
220  
221  
222  
223  
224  
225  
226  
227  
228  
229  
230  
231  
232  
233  
234  
235  
236  
237  
238  
239  
240  
241  
242  
243  
244  
245  
246  
247  
248  
249  
250  
251  
252  
253  
254  
255  
256  
257  
258  
259  
260  
261  
262  
263  
264  
265  
266  
267  
268  
269  
270  
271  
272  
273  
274  
275  
276  
277  
278  
279  
280  
281  
282  
283  
284  
285  
286  
287  
288  
289  
290  
291  
292  
293  
294  
295  
296  
297  
298  
299  
300  
301  
302  
303  
304  
305  
306  
307  
308  
309  
310  
311  
312  
313  
314  
315  
316  
317  
318  
319  
320  
321  
322  
323  
324  
325  
326  
327  
328  
329  
330  
331  
332  
333  
334  
335  
336  
337  
338  
339  
340  
341  
342  
343  
344  
345  
346  
347  
348  
349  
350  
351  
352  
353  
354  
355  
356  
357  
358  
359  
360  
361  
362  
363  
364  
365  
366  
367  
368  
369  
370  
371  
372  
373  
374  
375  
376  
377  
378  
379  
380  
381  
382  
383  
384  
385  
386  
387  
388  
389  
390  
391  
392  
393  
394  
395  
396  
397  
398  
399  
400  
401  
402  
403  
404  
405  
406  
407  
408  
409  
410  
411  
412  
413  
414  
415  
416  
417  
418  
419  
420  
421  
422  
423  
424  
425  
426  
427  
428  
429  
430  
431  
432  
433  
434  
435  
436  
437  
438  
439  
440  
441  
442  
443  
444  
445  
446  
447  
448  
449  
450  
451  
452  
453  
454  
455  
456  
457  
458  
459  
460  
461  
462  
463  
464  
465  
466  
467  
468  
469  
470  
471  
472  
473  
474  
475  
476  
477  
478  
479  
480  
481  
482  
483  
484  
485  
486  
487  
488  
489  
490  
491  
492  
493  
494  
495  
496  
497  
498  
499  
500  
501  
502  
503  
504  
505  
506  
507  
508  
509  
510  
511  
512  
513  
514  
515  
516  
517  
518  
519  
520  
521  
522  
523  
524  
525  
526  
527  
528  
529  
530  
531  
532  
533  
534  
535  
536  
537  
538  
539  
540  
541  
542  
543  
544  
545  
546  
547  
548  
549  
550  
551  
552  
553  
554  
555  
556  
557  
558  
559  
560  
561  
562  
563  
564  
565  
566  
567  
568  
569  
570  
571  
572  
573  
574  
575  
576  
577  
578  
579  
580  
581  
582  
583  
584  
585  
586  
587  
588  
589  
590  
591  
592  
593  
594  
595  
596  
597  
598  
599  
600  
601  
602  
603  
604  
605  
606  
607  
608  
609  
610  
611  
612  
613  
614  
615  
616  
617  
618  
619  
620  
621  
622  
623  
624  
625  
626  
627  
628  
629  
630  
631  
632  
633  
634  
635  
636  
637  
638  
639  
640  
641  
642  
643  
644  
645  
646  
647  
648  
649  
650  
651  
652  
653  
654  
655  
656  
657  
658  
659  
660  
661  
662  
663  
664  
665  
666  
667  
668  
669  
670  
671  
672  
673  
674  
675  
676  
677  
678  
679  
680  
681  
682  
683  
684  
685  
686  
687  
688  
689  
690  
691  
692  
693  
694  
695  
696  
697  
698  
699  
700  
701  
702  
703  
704  
705  
706  
707  
708  
709  
710  
711  
712  
713  
714  
715  
716  
717  
718  
719  
720  
721  
722  
723  
724  
725  
726  
727  
728  
729  
730  
731  
732  
733  
734  
735  
736  
737  
738  
739  
740  
741  
742  
743  
744  
745  
746  
747  
748  
749  
750  
751  
752  
753  
754  
755  
756  
757  
758  
759  
760  
761  
762  
763  
764  
765  
766  
767  
768  
769  
770  
771  
772  
773  
774  
775  
776  
777  
778  
779  
780  
781  
782  
783  
784  
785  
786  
787  
788  
789  
790  
791  
792  
793  
794  
795  
796  
797  
798  
799  
800  
801  
802  
803  
804  
805  
806  
807  
808  
809  
810  
811  
812  
813  
814  
815  
816  
817  
818  
819  
820  
821  
822  
823  
824  
825  
826  
827  
828  
829  
830  
831  
832  
833  
834  
835  
836  
837  
838  
839  
840  
841  
842  
843  
844  
845  
846  
847  
848  
849  
850  
851  
852  
853  
854  
855  
856  
857  
858  
859  
860  
861  
862  
863  
864  
865  
866  
867  
868  
869  
870  
871  
872  
873  
874  
875  
876  
877  
878  
879  
880  
881  
882  
883  
884  
885  
886  
887  
888  
889  
890  
891  
892  
893  
894  
895  
896  
897  
898  
899  
900  
901  
902  
903  
904  
905  
906  
907  
908  
909  
910  
911  
912  
913  
914  
915  
916  
917  
918  
919  
920  
921  
922  
923  
924  
925  
926  
927  
928  
929  
930  
931  
932  
933  
934  
935  
936  
937  
938  
939  
940  
941  
942  
943  
944  
945  
946  
947  
948  
949  
950  
951  
952  
953  
954  
955  
956  
957  
958  
959  
960  
961  
962  
963  
964  
965  
966  
967  
968  
969  
970  
971  
972  
973  
974  
975  
976  
977  
978  
979  
980  
981  
982  
983  
984  
985  
986  
987  
988  
989  
990  
991  
992  
993  
994  
995  
996  
997  
998  
999  
1000

Apart from poor documentation of the criteria “blinding”, “randomisation” and “harms,”  
our study revealed additional massive deficits in the documentation of “definition of

1  
2  
3 primary endpoint”, “results/outcomes” and “conclusion” (see Table 2 and Fig. 3). In the  
4  
5 evaluation of “accuracy”, the degree of adherence declined by at least 30%, since the  
6  
7 pertinent information was documented in the abstract but not in the manner required  
8  
9 by CONSORT-A. Deficits in the implementation of CONSORT-A recommendations  
10  
11 therefore tend to occur more frequently with methodological criteria, as was confirmed  
12  
13 by Ghimire et al. This research team reports a documentation of randomisation  
14  
15 (“Allocation Concealment”) in only 12% of abstracts, and of blinding in only 21%,<sup>[23]</sup>.  
16  
17 Obviously there are criteria which authors adhere to in general, and a few others  
18  
19 (statistical criteria) that are reported infrequently. It can be assumed that a large  
20  
21 number of individuals is involved in the compilation of an abstract (publication), so that  
22  
23 different text sections are inevitably drawn up with different prerequisites and quality  
24  
25 requirements (transparency and completeness). This may explain deficits in specific  
26  
27 areas. Deficits in the statistical aspects in particular might be reduced by involving  
28  
29 medical statisticians / biometricians in the compilation of publications and also in the  
30  
31 review process.  
32  
33  
34  
35  
36  
37  
38  
39

40 Currently, 585 journals refer authors to the CONSORT statement,<sup>[24]</sup>; nevertheless,  
41  
42 there is an urgent need to improve abstracts. Findings from this study suggest that not  
43  
44 all authors pay attention to the CONSORT statement as recommended by journals.  
45  
46 The statement for abstracts and the corresponding checklist as well as the interactive  
47  
48 exploration platform provided in this context (CONSORT, 2019b; Hopewell et al.,  
49  
50 2008b) appear to be inadequate to ensure transparent and comprehensive reporting  
51  
52 even though they contain exact and detailed instructions for implementation as well as  
53  
54 specific examples. A particularly worrying fact is that the low rate of implementation  
55  
56 was also found for criteria which are easy to meet, such as the identification of a  
57  
58 publication as RCT in the title, documentation of registration ID, or number of  
59  
60

1  
2  
3 participants included in the analysis. It seems reasonable to assume that  
4  
5 recommendations for the publication standard were not implemented because the  
6  
7 authors would have to study additional literature for this purpose, and might not have  
8  
9 the time or patience to do so. A large part of journals supports the idea to explicitly  
10  
11 request authors to use the CONSORT checklist; CONSORT is endorsed by over 50%  
12  
13 of the core medical journals listed in the *Abridged Index Medicus* on PubMed as per  
14  
15 April 2020,[25]. A general request to adhere to the CONSORT-A checklist in the  
16  
17 drafting of publications and a demand for obligatory implementation on the part of all  
18  
19 journals may further improve reporting quality in abstracts and thus promote  
20  
21 comprehensive and transparent presentation. Moreover, reviewers should check data  
22  
23 for completeness and accuracy. Bearing in mind that publications are reviewed under  
24  
25 increasing time pressure and primarily outside the job and on an honorary basis, the  
26  
27 entire review system might have to be reconsidered. One option would be to check  
28  
29 abstracts/publications for completeness of reporting as a preliminary step, followed by  
30  
31 the actual review procedure.  
32  
33  
34  
35  
36  
37  
38  
39

## 40 **Conclusion**

41  
42 Even though the CONSORT group gave recommendations for the compilation of  
43  
44 abstracts as early as in 2008, the quality of such “mini publications” remained  
45  
46 suboptimal. Co-authors well versed in statistics should address and/or check  
47  
48 methodological criteria in particular in the drafting of abstracts and in the review  
49  
50 process. Word count limitation seems to be another reason for the reduction of  
51  
52 important information. Abstracts play a key role for readers, and journals should not  
53  
54 restrict the admissible number of words too rigidly.  
55  
56  
57  
58  
59  
60

1  
2  
3 **Authors' contributions:** Stephanie Knippschild wrote the initial draft of this  
4 manuscript and performed major parts of the statistical analysis. Jeremias  
5 Loddenkemper screened all abstracts of the literature search through PubMed and  
6 documented suitable publications for further processing. Moreover, he extracted the  
7 necessary information for evaluating the abstract quality and performed data entry and  
8 data validation. Sabrina Tulka performed the regression analysis and revised the initial  
9 draft of this manuscript. Christine Loddenkemper conducted the validation of the pool  
10 of studies by screening all abstracts and evaluating the studies included. Christine  
11 Baulig designed the meta-investigation and its analysis concept; she implemented the  
12 literature search including the identification of those RCTs to be included in the meta-  
13 analysis and thoroughly revised the initial draft of this manuscript.  
14  
15  
16  
17  
18  
19  
20  
21  
22  
23  
24  
25  
26  
27  
28  
29  
30

### 31 **Acknowledgement**

32  
33  
34 The authors thank Christina Wagner for linguistic support in the preparation of this  
35 manuscript.  
36  
37  
38  
39

### 40 **Competing interests**

41  
42  
43 This study is part of the doctoral thesis written by Mr. Jeremias Loddenkemper in pursuit of a  
44 doctoral degree in dental medicine ("Dr. med. dent.") at Witten/Herdecke University.  
45  
46  
47

48 Furthermore, the results contained in this article have already been presented by means of  
49 an poster presentation at 33. Kongress of the DGI, Hamburg (November 28.-30. 2019)  
50  
51

### 52 **Non-financial competing interests**

## Literaturverzeichnis

1. EQUATOR-Network. EQUATOR-Network: Minervation Ltd; [Available from: <https://www.equator-network.org/reporting-guidelines/>].
2. CONSORT. Extensions of the CONSORT Statement 2019 [Available from: <http://www.consort-statement.org/extensions>].
3. Barry HC, Ebell MH, Shaughnessy AF, et al. Family physicians' use of medical abstracts to guide decision making: style or substance? *J Am Board Fam Pract* 2001;14:437-42.
4. Wang L, Li Y, Li J, et al. Quality of reporting of trial abstracts needs to be improved: using the CONSORT for abstracts to assess the four leading Chinese medical journals of traditional Chinese medicine. *Trials* 2010;11:75.
5. Alharbi F, Almuzian M. The quality of reporting RCT abstracts in four major orthodontics journals for the period 2012-2017. *J Orthod* 2019;46:225-34.
6. Baulig C, Krummenauer F, Geis B, et al. Reporting quality of randomised controlled trial abstracts on age-related macular degeneration health care: a cross-sectional quantification of the adherence to CONSORT abstract reporting recommendations. *BMJ Open* 2018;8:e021912.
7. Khan MS, Shaikh A, Ochani RK, et al. Assessing the Quality of Abstracts in Randomized Controlled Trials Published in High Impact Cardiovascular Journals. *Circ Cardiovasc Qual Outcomes* 2019;12:e005260.
8. Kuriyama A, Takahashi N, Nakayama T. Reporting of critical care trial abstracts: a comparison before and after the announcement of CONSORT guideline for abstracts. *Trials* 2017;18:32.
9. Hopewell S, Clarke M, Moher D, et al. CONSORT for reporting randomised trials in journal and conference abstracts. *Lancet* 2008;371:281-3.
10. Hopewell S, Clarke M, Moher D, et al. CONSORT for reporting randomized controlled trials in journal and conference abstracts: explanation and elaboration. *PLoS Med* 2008;5:e20.
11. Excel®. Microsoft® Excel® 2010. Redmond WA USA Microsoft Corporation. ; 2010.
12. De Angelis N, Nevins ML, Camelo MC, et al. Platform switching versus conventional technique: a randomized controlled clinical trial. *The International journal of periodontics & restorative dentistry* 2014;34 Suppl 3:s75-9.
13. Pistilli R, Felice P, Piatelli M, et al. Blocks of autogenous bone versus xenografts for the rehabilitation of atrophic jaws with dental implants: preliminary data from a pilot randomised controlled trial. *European journal of oral implantology* 2014;7:153-71.
14. Gocmen G, Atali O, Aktop S, et al. Hyaluronic Acid Versus Ultrasonic Resorbable Pin Fixation for Space Maintenance in Non-Grafted Sinus Lifting. *Journal of oral and maxillofacial surgery : official journal of the American Association of Oral and Maxillofacial Surgeons* 2016;74:497-504.
15. Kasperski J, Rosak P, Roj R, et al. The influence of low-frequency variable magnetic fields in reducing pain experience after dental implant treatment. *Acta Bioeng Biomech* 2015;17:97-105.
16. Torroella-Saura G, Mareque-Bueno J, Cabratosa-Termes J, et al. Effect of implant design in immediate loading. A randomized, controlled, split-mouth, prospective clinical trial. *Clinical oral implants research* 2015;26:240-4.
17. Arduino PG, Tirone F, Schiorlin E, et al. Single preoperative dose of prophylactic amoxicillin versus a 2-day postoperative course in dental implant surgery: A two-centre randomised controlled trial. *European journal of oral implantology* 2015;8:143-9.
18. Arbab H, Greenwell H, Hill M, et al. Ridge Preservation Comparing a Nonresorbable PTFE Membrane to a Resorbable Collagen Membrane: A Clinical and Histologic Study in Humans. *Implant dentistry* 2016;25:128-34.
19. Berwanger O, Ribeiro RA, Finkelsztejn A, et al. The quality of reporting of trial abstracts is suboptimal: survey of major general medical journals. *J Clin Epidemiol* 2009;62:387-92.
20. Gallo L, Wakeham S, Dunn E, et al. The Reporting Quality of Randomized Controlled Trial Abstracts in Plastic Surgery. *Aesthet Surg J* 2020;40:335-41.

- 1  
2  
3 21. Chow JTY, Turkstra TP, Yim E, et al. The degree of adherence to CONSORT reporting guidelines  
4 for the abstracts of randomised clinical trials published in anaesthesia journals: A cross-sectional study  
5 of reporting adherence in 2010 and 2016. *Eur J Anaesthesiol* 2018;942-8.  
6  
7 22. Speich B, Mc Cord KA, Agarwal A, et al. Reporting Quality of Journal Abstracts for Surgical  
8 Randomized Controlled Trials Before and After the Implementation of the CONSORT Extension for  
9 Abstracts. *World J Surg* 2019;2371-8.  
10  
11 23. Ghimire S, Kyung E, Kang W, et al. Assessment of adherence to the CONSORT statement for  
12 quality of reports on randomized controlled trial abstracts from four high-impact general medical  
13 journals. *Trials* 2012;13:77.  
14  
15 24. CONSORT. Endorsers - Journals and Organizations: CONSORT; 2019 [Available from:  
16 <http://www.consort-statement.org/about-consort/endorsers1>.  
17  
18 25. Group TC. Endorsers-Journals and Organizations 2020 [Available from: [http://www.consort-](http://www.consort-statement.org/about-consort/endorsers1)  
19 [statement.org/about-consort/endorsers1](http://www.consort-statement.org/about-consort/endorsers1).  
20  
21  
22  
23  
24  
25  
26  
27  
28  
29  
30  
31  
32  
33  
34  
35  
36  
37  
38  
39  
40  
41  
42  
43  
44  
45  
46  
47  
48  
49  
50  
51  
52  
53  
54  
55  
56  
57  
58  
59  
60



1  
2  
3 **Fig. 1:** Description of the selection procedure and documentation of the number of  
4 published RCTs from dental implantology, the aim being a data pool to identify – per  
5 criterion and study – the degree of adherence to the CONSORT recommendations for  
6 abstracts. 50 study reports had to be excluded from further investigation and analysis  
7 because the field of indication (N=1) or the study design (N=39) were not compatible,  
8 or the respective datasets referred to investigations of animals (N=7), were reviews  
9 (N=1) or not identifiable as RCTs (N=2).

10  
11  
12  
13  
14  
15  
16  
17  
18  
19  
20  
21 **Fig. 2:** Illustration of degree of adherence per study (%) via box plot (N=212). Degree  
22 of adherence I (quantitative implementation), degree of adherence II (qualitative  
23 implementation).

24  
25  
26  
27  
28  
29  
30  
31 **Fig. 3:** Graphic display of proportional implementation of criteria to facilitate the location  
32 of pertinent information in the abstract (degree of adherence I vs. degree of adherence  
33 II).

34  
35  
36  
37  
38  
39  
40 **Supplementary Fig. 1:** Graphic display of proportional implementation of criteria to  
41 facilitate the location of pertinent information in the abstract (degree of adherence I).

42  
43  
44  
45  
46  
47 **Supplementary Fig. 2:** Illustration of degree of adherence per study (%) via box plot  
48 (N=212). Degree of adherence I (quantitative implementation), degree of adherence  
49 II (qualitative implementation). Evaluation of reduced datapool with 14 criteria  
50 (excluded: “registration” and “funding”).

51  
52  
53  
54  
55  
56  
57  
58 **Supplementary Fig. 3:** Illustration of degree of adherence per study (%) via box plot  
59 (N=212) as comparison of datapools with 14 vs. 16 criteria. Degree of adherence I  
60

1  
2  
3 (quantitative implementation), degree of adherence II (qualitative implementation).  
4

5 Evaluation of reduced datapool was based on 14 criteria (excluded: “registration” and  
6  
7 “funding”).  
8  
9  
10  
11  
12  
13  
14  
15  
16  
17  
18  
19  
20  
21  
22  
23  
24  
25  
26  
27  
28  
29  
30  
31  
32  
33  
34  
35  
36  
37  
38  
39  
40  
41  
42  
43  
44  
45  
46  
47  
48  
49  
50  
51  
52  
53  
54  
55  
56  
57  
58  
59  
60

For peer review only

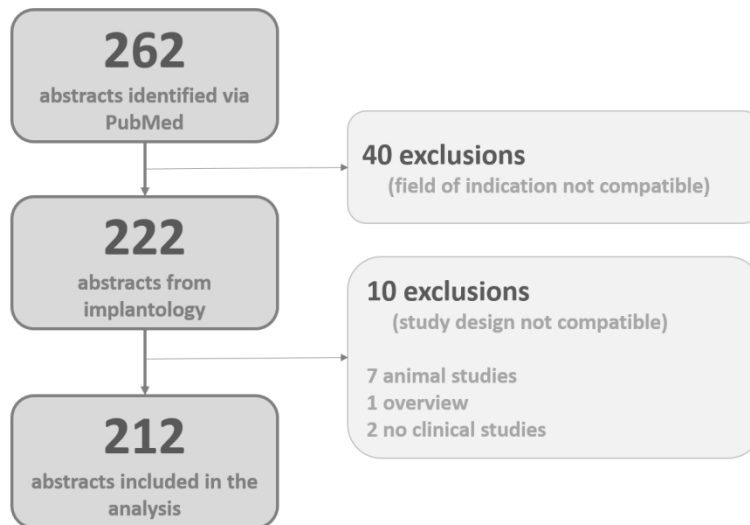

Description of the selection procedure and documentation of the number of published RCTs from dental implantology, the aim being a data pool to identify – per criterion and study – the degree of adherence to the CONSORT recommendations for abstracts. 50 study reports had to be excluded from further investigation and analysis because the field of indication (N=1) or the study design (N=39) were not compatible, or the respective datasets referred to investigations of animals (N=7), were reviews (N=1) or not identifiable as RCTs (N=2).

283x182mm (150 x 150 DPI)

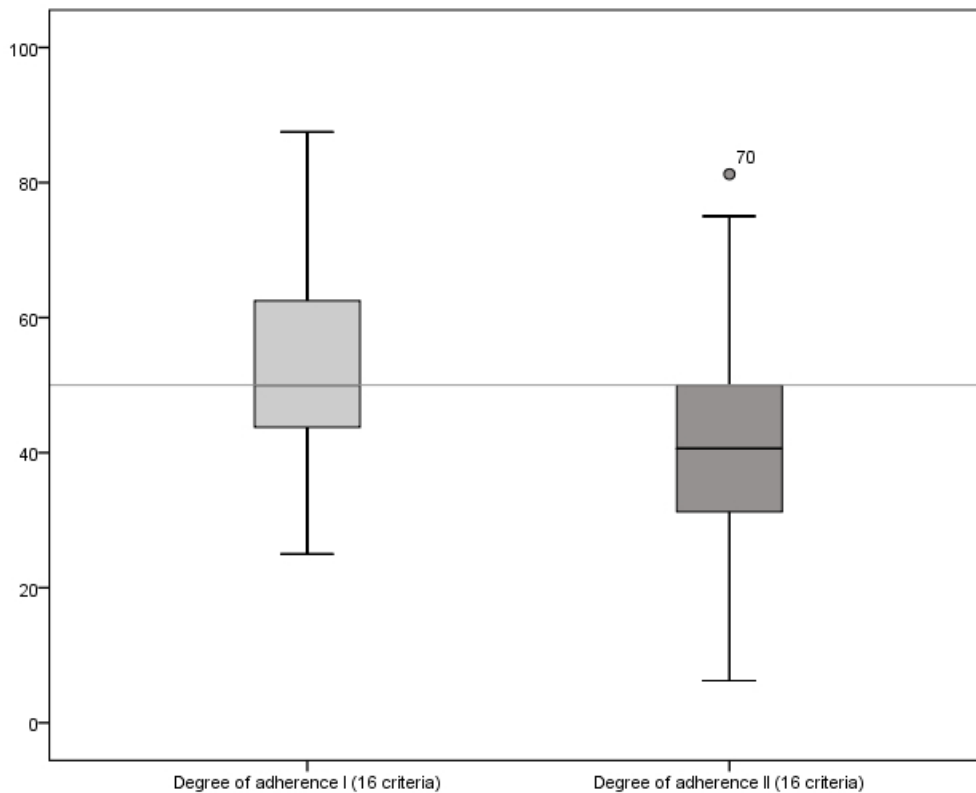

Illustration of degree of adherence per study (%) via box plot (N=212). Degree of adherence I (quantitative implementation), degree of adherence II (qualitative implementation).

220x176mm (72 x 72 DPI)

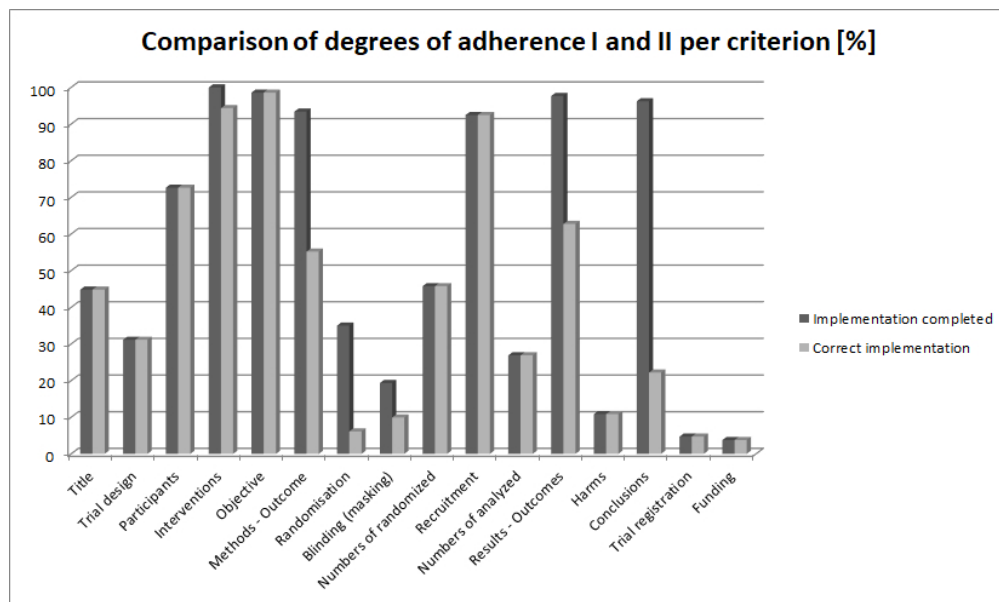

Graphic display of proportional implementation of criteria to facilitate the location of pertinent information in the abstract (degree of adherence I vs. degree of adherence II).

69x41mm (300 x 300 DPI)

| CONSORT criterion                                        | Degree of adherence I                                                                                                    | Degree of adherence II                                                                                                       |
|----------------------------------------------------------|--------------------------------------------------------------------------------------------------------------------------|------------------------------------------------------------------------------------------------------------------------------|
| <b>Identification as a randomised trial in the title</b> | Does the title contain "randomised controlled trial" or RCT?                                                             | *                                                                                                                            |
| <b>Trial design</b>                                      | Description of design in addition to: RCT (randomised, controlled) and Multicentre...                                    | *                                                                                                                            |
| <b>Participant characteristics</b>                       | To document patient characteristics in the abstract, it is not enough to say that patients are suitable for the therapy. | *                                                                                                                            |
| <b>Interventions</b>                                     | Intervention indicated                                                                                                   | Intervention for each group including dosis indicated                                                                        |
| <b>Objective</b>                                         | Specific objective or hypothesis                                                                                         | *                                                                                                                            |
| <b>Definition primary endpoint</b>                       | Documentation of (multiple) endpoints                                                                                    | Clearly defined primary endpoint including measurement variables                                                             |
| <b>Randomisation</b>                                     | Documentation of randomisation ratio in the section Material and Methods                                                 | Description of method used to generate the random allocation sequence and implementation in the section Material and Methods |
| <b>Blinding</b>                                          | Documentation of "blinded" procedure using "masked", "blinded", "doubleblind" or similar descriptions                    | Exact indication of which patient group was blinded                                                                          |
| <b>Numbers randomised</b>                                | Number of patients randomised to each group must be given, or at least total number with randomisation ratio!            | *                                                                                                                            |
| <b>Recruitment</b>                                       | Dates defining the trial period (trial completed/interim report/trial from ... to ...).                                  | *                                                                                                                            |
| <b>Numbers analysed</b>                                  | Number of participants analysed in EACH group                                                                            | *                                                                                                                            |
| <b>Results of outcome</b>                                | Results reported in section "Results"                                                                                    | Results were reported with reference to the primary endpoint. Effect size and precision are reported for each group.         |
| <b>Harms</b>                                             | General description                                                                                                      | *                                                                                                                            |
| <b>Conclusion</b>                                        | The abstract contains a conclusion or summary.                                                                           | The conclusion refers to the research question/results and lists benefits and limitations of the study                       |
| <b>Trial registration</b>                                | Registration number                                                                                                      | *                                                                                                                            |
| <b>Funding</b>                                           | Source of funding                                                                                                        | *                                                                                                                            |

Supplementary table 1: Evaluation basis for CONSORT-A criteria referring to degree of adherence I (information given in the abstract) and degree of adherence II (correct documentation in accordance

1  
2  
3 with CONSORT-A). \* Variables without formal degree of adherence II. Values from degree of adherence  
4  
5 I are transferred.  
6  
7  
8  
9  
10  
11  
12  
13  
14  
15  
16  
17  
18  
19  
20  
21  
22  
23  
24  
25  
26  
27  
28  
29  
30  
31  
32  
33  
34  
35  
36  
37  
38  
39  
40  
41  
42  
43  
44  
45  
46  
47  
48  
49  
50  
51  
52  
53  
54  
55  
56  
57  
58  
59  
60

For peer review only

| Search | MESH Therms                                                                                                                                                                                               | No. of studies |
|--------|-----------------------------------------------------------------------------------------------------------------------------------------------------------------------------------------------------------|----------------|
| #8     | Search (((("randomized controlled trial"[Publication Type]) AND ("2014"[Date - Publication] : "2016"[Date - Publication])) AND human) AND (((dental implantation) OR dental implant) OR tooth artificial) | 262            |
| #7     | ((dental implantation) OR dental implant) OR tooth artificial                                                                                                                                             | 46684          |
| #6     | Search dental implantation                                                                                                                                                                                | 21511          |
| #4     | Search human                                                                                                                                                                                              | 16842581       |
| #2     | Search ("2014"[Date - Publication] : "2016"[Date - Publication])                                                                                                                                          | 3387284        |
| #1     | Search "randomized controlled trial"[Publication Type]                                                                                                                                                    | 429525         |

Supplementary table 2: Result from literature research in the electronic database PubMed on March 7, 2017



| <b>Journal</b><br><i>[journal title abbreviation]</i> | <b>Number</b><br><i>[N]</i> | <b>Proportion</b><br><i>(%)</i> | <b>5-year IF</b><br><i>[as per 2018]</i> | <b>Word count limits</b><br><i>[words]</i> |
|-------------------------------------------------------|-----------------------------|---------------------------------|------------------------------------------|--------------------------------------------|
| Acta Bioeng Biomech                                   | 1                           | 0,5                             | 1,112                                    | 150-250                                    |
| Acta Odontol Scand                                    | 3                           | 1,4                             | 1,565                                    | 250                                        |
| Am J Dent                                             | 1                           | 0,5                             | 0,720                                    | No limit                                   |
| Am J Orthod Dentofacial Orthop                        | 2                           | 0,9                             | 1,911                                    | 250                                        |
| Angle Orthod                                          | 1                           | 0,5                             | 1,880                                    | 250                                        |
| Ann Anat                                              | 2                           | 0,9                             | 2,241                                    | No limit                                   |
| Biomed Res Int                                        | 3                           | 1,4                             | 2,197                                    | 300                                        |
| Br J Oral Maxillofac Surg                             | 2                           | 0,9                             | 1,164                                    | 250                                        |
| Clin Implant Dent Relat Res                           | 22                          | 10,4                            | 3,212                                    | 150-200                                    |
| Clin Oral Implants Res                                | 36                          | 17,0                            | 3,825                                    | 250                                        |
| Compend Contin Educ Dent                              | 1                           | 0,5                             | 0                                        | n.a.                                       |
| Curr Med Res Opin                                     | 1                           | 0,5                             | 2,345                                    | 250                                        |
| Eur J Oral Implantol                                  | 36                          | 17,0                            | 2,513                                    | 250                                        |
| Eur J Orthod                                          | 1                           | 0,5                             | 1,841                                    | 330                                        |
| Hua Xi Kou Qiang Yi Xue Za Zhi                        | 2                           | 0,9                             | 0                                        | No limit                                   |
| Int J Oral Maxillofac Surg                            | 7                           | 3,3                             | 1,961                                    | 300                                        |
| Int J Oral Maxillofac Implants                        | 23                          | 10,8                            | 1,734                                    | 350                                        |
| Int J Periodontics Restorative Dent                   | 7                           | 3,3                             | 1,228                                    | 75-100                                     |
| Int J Prosthodont                                     | 7                           | 3,3                             | 1,533                                    | 350                                        |
| Implant Dent                                          | 5                           | 2,4                             | 1,214                                    | 225                                        |
| J Biomater Appl                                       | 1                           | 0,5                             | 2,442                                    | No limit                                   |
| J Bone Miner Res                                      | 1                           | 0,5                             | 5,711                                    | 300                                        |
| J Clin Periodontol                                    | 9                           | 4,2                             | 4,164                                    | 200                                        |
| J Craniofac Surg                                      | 1                           | 0,5                             | 0,785                                    | 200                                        |
| J Dent                                                | 1                           | 0,5                             | 3,280                                    | 250                                        |
| J Dent Res                                            | 4                           | 1,9                             | 5,125                                    | 300                                        |
| J Oral Implantol                                      | 3                           | 1,4                             | 5,125                                    | 250                                        |
| J Oral Maxillofac Surg                                | 1                           | 0,5                             | 1,781                                    | 300                                        |
| J Oral Rehabil                                        | 3                           | 1,4                             | 2,341                                    | 250                                        |
| J Periodontol                                         | 4                           | 1,9                             | 2,768                                    | 250                                        |
| J Periodontal Res                                     | 1                           | 0,5                             | 2,613                                    | 250                                        |
| J Plast Reconstr Aesthet Surg                         | 1                           | 0,5                             | 2,228                                    | 250                                        |
| J Prosthodont                                         | 2                           | 0,9                             | 2,636                                    | 350                                        |
| Med Oral Patol Oral Cir Bucal                         | 3                           | 1,4                             | 1,284                                    | 150-300                                    |
| Oral Maxillofac Surg                                  | 1                           | 0,5                             | 1,781                                    | 300                                        |
| Oxid Med Cell Longev                                  | 1                           | 0,5                             | 4,868                                    | 200                                        |
| Prog Orthod                                           | 1                           | 0,5                             | 1,381                                    | 350                                        |
| Quintessence Int                                      | 1                           | 0,5                             | 1,392                                    | 250                                        |
| Saudi Med J                                           | 2                           | 0,9                             | 1,055                                    | 230                                        |
| Sci Rep                                               | 1                           | 0,5                             | 4,011                                    | 200                                        |
| Stomatologiia                                         | 1                           | 0,5                             | 0                                        | 250                                        |
| Swed Dent J                                           | 1                           | 0,5                             | 0,818                                    | 300                                        |

|                          |            |              |       |         |
|--------------------------|------------|--------------|-------|---------|
| Trials                   | 3          | 1,4          | 1,975 | 350     |
| Vestn Ross Akad Med Nauk | 1          | 0,5          | 0     | 300-500 |
| Vojnosanit Pregl         | 1          | 0,5          | 0,272 | 450     |
| <b>Total</b>             | <b>212</b> | <b>100,0</b> |       |         |

Supplementary table 3: List of journals [N] (%) from which information was extracted for final analysis, 5-year Impact Factor [2018] and word count limits for each journal as per 2019

For peer review only

| Criterion                 | Percentage match | Kappa | <b>*Kappa 0.61 – 1.0</b><br>(essential match and almost perfect match) |
|---------------------------|------------------|-------|------------------------------------------------------------------------|
| <b>Title</b>              | 83%              | 0,677 | *                                                                      |
| <b>Trial design</b>       | 89%              | 0,738 | *                                                                      |
| <b>Participants</b>       | 90%              | 0,744 | *                                                                      |
| <b>Interventions</b>      | 100%             | n.a.  |                                                                        |
| <b>Objective</b>          | 100%             | 0,798 | *                                                                      |
| <b>Outcome</b>            | 91%              | 0,312 |                                                                        |
| <b>Randomisation</b>      | 82%              | 0,318 |                                                                        |
| <b>Blinding (masking)</b> | 92%              | 0,726 | *                                                                      |
| <b>Numbers randomised</b> | 76%              | 0,515 |                                                                        |
| <b>Recruitment</b>        | 85%              | 0,310 |                                                                        |
| <b>Numbers analysed</b>   | 84%              | 0,606 |                                                                        |
| <b>Outcome</b>            | 100%             | 1,000 | *                                                                      |
| <b>Harms</b>              | 62%              | 0,041 |                                                                        |
| <b>Conclusions</b>        | 100%             | 1,000 | *                                                                      |
| <b>Trial registration</b> | 97%              | 0,449 |                                                                        |
| <b>Funding</b>            | 99%              | 0,762 | *                                                                      |

Supplementary table 4: Calculation of Kappa for inter-rater reliability; percentage match between evaluators; Kappa, n.a.= in this case calculation of Kappa was not performed (SPSS) since one evaluator had rated the criterion "intervention" as 1 for all publications; (\*) for criteria which showed an essential match or an almost perfect match between evaluators.

# Degree of adherence per criterion - degree of adherence I [%]

BMJ Open

Page 34 of 38

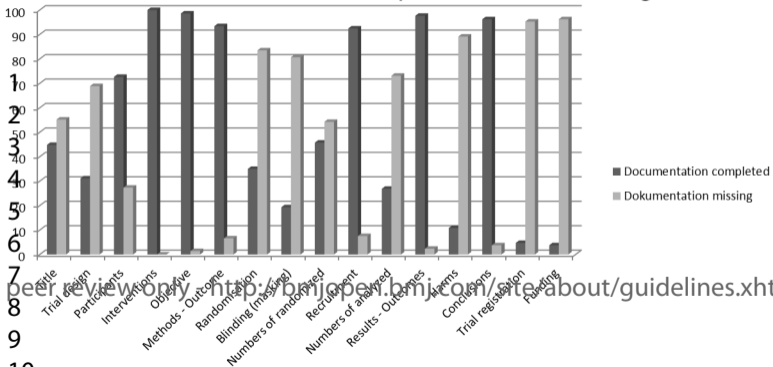

Peer review only <http://bmjopen.bmj.com/site/about/guidelines.xhtml>

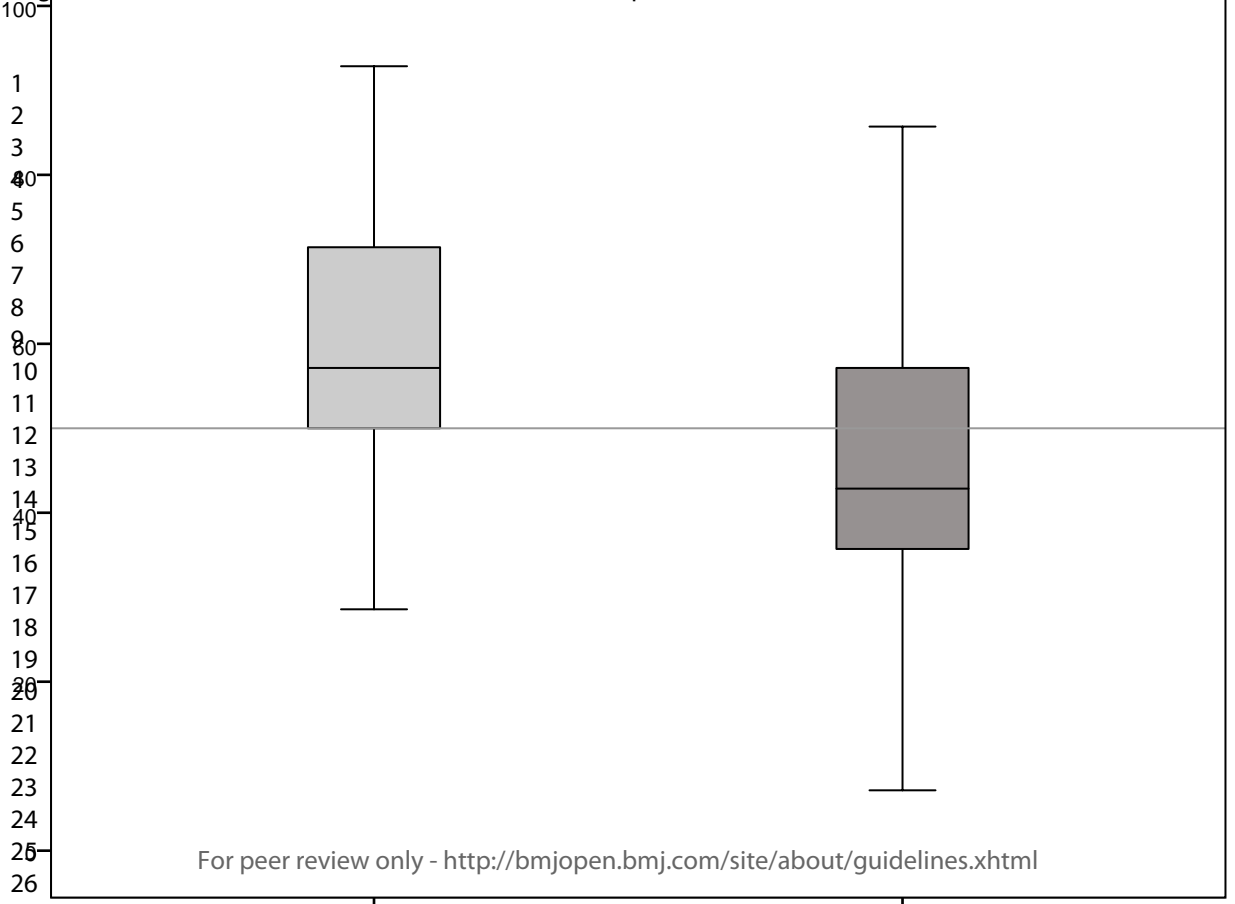

For peer review only - <http://bmjopen.bmj.com/site/about/guidelines.xhtml>

Degree of adherence I (14 criteria)

Degree of adherence II (14 criteria)

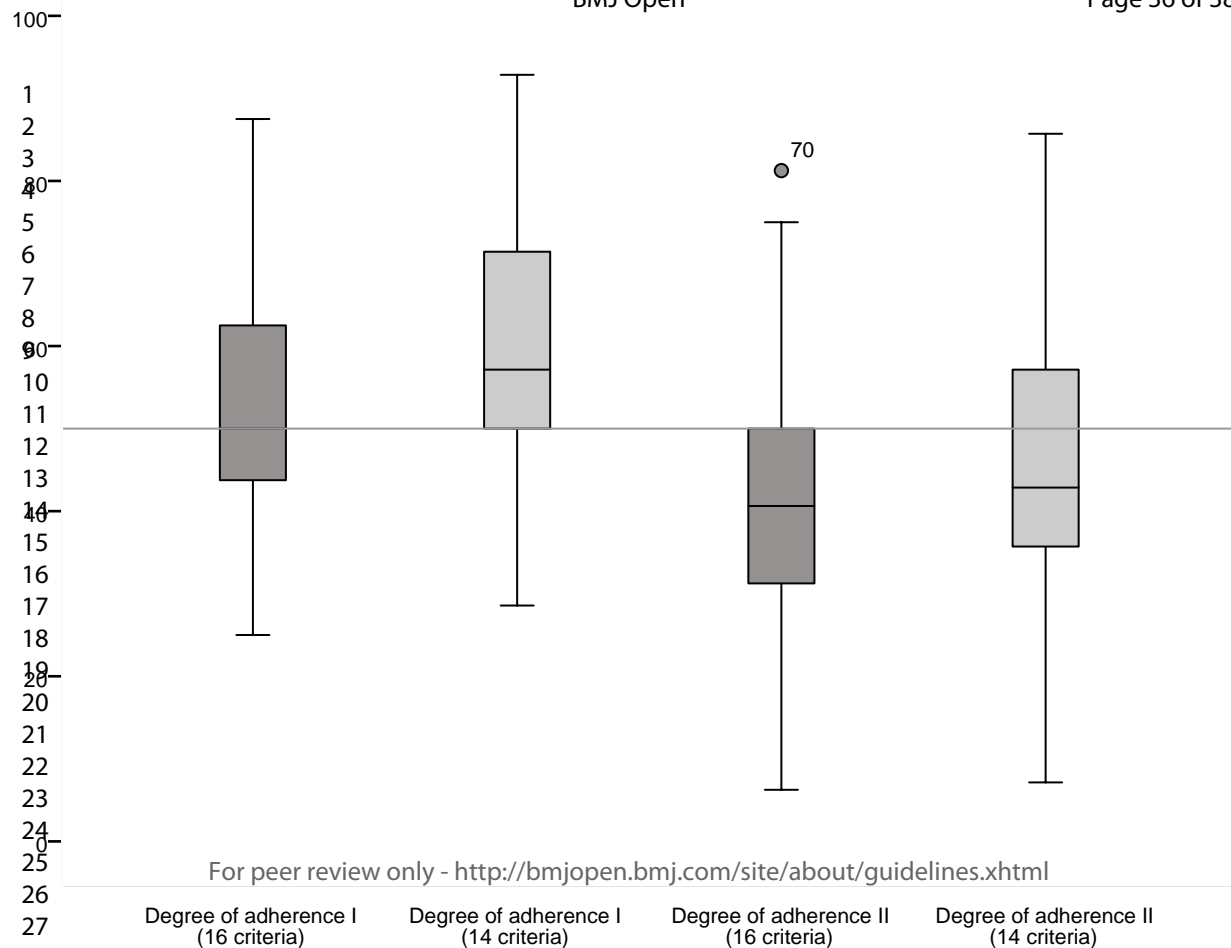

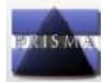

# PRISMA 2009 Checklist

1  
2  
3  
4  
5  
6  
7  
8  
9  
10  
11  
12  
13  
14  
15  
16  
17  
18  
19  
20  
21  
22  
23  
24  
25  
26  
27  
28  
29  
30  
31  
32  
33  
34  
35  
36  
37  
38  
39  
40  
41  
42  
43  
44  
45  
46  
47

| Section/topic                      | #  | Checklist item                                                                                                                                                                                                                                                                                              | Reported on page #                 |
|------------------------------------|----|-------------------------------------------------------------------------------------------------------------------------------------------------------------------------------------------------------------------------------------------------------------------------------------------------------------|------------------------------------|
| <b>TITLE</b>                       |    |                                                                                                                                                                                                                                                                                                             |                                    |
| Title                              | 1  | Identify the report as a systematic review, meta-analysis, or both.                                                                                                                                                                                                                                         | 1                                  |
| <b>ABSTRACT</b>                    |    |                                                                                                                                                                                                                                                                                                             |                                    |
| Structured summary                 | 2  | Provide a structured summary including, as applicable: background; objectives; data sources; study eligibility criteria, participants, and interventions; study appraisal and synthesis methods; results; limitations; conclusions and implications of key findings; systematic review registration number. | II                                 |
| <b>INTRODUCTION</b>                |    |                                                                                                                                                                                                                                                                                                             |                                    |
| Rationale                          | 3  | Describe the rationale for the review in the context of what is already known.                                                                                                                                                                                                                              | 1-3                                |
| Objectives                         | 4  | Provide an explicit statement of questions being addressed with reference to participants, interventions, comparisons, outcomes, and study design (PICOS).                                                                                                                                                  | 3                                  |
| <b>METHODS</b>                     |    |                                                                                                                                                                                                                                                                                                             |                                    |
| Protocol and registration          | 5  | Indicate if a review protocol exists, if and where it can be accessed (e.g., Web address), and, if available, provide registration information including registration number.                                                                                                                               | n.a.                               |
| Eligibility criteria               | 6  | Specify study characteristics (e.g., PICOS, length of follow-up) and report characteristics (e.g., years considered, language, publication status) used as criteria for eligibility, giving rationale.                                                                                                      | 4-5                                |
| Information sources                | 7  | Describe all information sources (e.g., databases with dates of coverage, contact with study authors to identify additional studies) in the search and date last searched.                                                                                                                                  | 4                                  |
| Search                             | 8  | Present full electronic search strategy for at least one database, including any limits used, such that it could be repeated.                                                                                                                                                                               | Supplementary table 2              |
| Study selection                    | 9  | State the process for selecting studies (i.e., screening, eligibility, included in systematic review, and, if applicable, included in the meta-analysis).                                                                                                                                                   | 4<br>Figure 1                      |
| Data collection process            | 10 | Describe method of data extraction from reports (e.g., piloted forms, independently, in duplicate) and any processes for obtaining and confirming data from investigators.                                                                                                                                  | 4                                  |
| Data items                         | 11 | List and define all variables for which data were sought (e.g., PICOS, funding sources) and any assumptions and simplifications made.                                                                                                                                                                       | 3-4                                |
| Risk of bias in individual studies | 12 | Describe methods used for assessing risk of bias of individual studies (including specification of whether this was done at the study or outcome level), and how this information is to be used in any data synthesis.                                                                                      | n.a. -><br>Assessment of Abstracts |
| Summary measures                   | 13 | State the principal summary measures (e.g., risk ratio, difference in means).                                                                                                                                                                                                                               | 4-5                                |

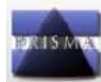

# PRISMA 2009 Checklist

|                      |    |                                                                                                                                                           |      |
|----------------------|----|-----------------------------------------------------------------------------------------------------------------------------------------------------------|------|
| Synthesis of results | 14 | Describe the methods of handling data and combining results of studies, if done, including measures of consistency (e.g., $I^2$ ) for each meta-analysis. | n.a. |
|----------------------|----|-----------------------------------------------------------------------------------------------------------------------------------------------------------|------|

Page 1 of 2

| Section/topic                 | #  | Checklist item                                                                                                                                                                                           | Reported on page #              |
|-------------------------------|----|----------------------------------------------------------------------------------------------------------------------------------------------------------------------------------------------------------|---------------------------------|
| Risk of bias across studies   | 15 | Specify any assessment of risk of bias that may affect the cumulative evidence (e.g., publication bias, selective reporting within studies).                                                             | n.a. -> Assessment of Abstracts |
| Additional analyses           | 16 | Describe methods of additional analyses (e.g., sensitivity or subgroup analyses, meta-regression), if done, indicating which were pre-specified.                                                         | 5                               |
| <b>RESULTS</b>                |    |                                                                                                                                                                                                          |                                 |
| Study selection               | 17 | Give numbers of studies screened, assessed for eligibility, and included in the review, with reasons for exclusions at each stage, ideally with a flow diagram.                                          | Table 1                         |
| Study characteristics         | 18 | For each study, present characteristics for which data were extracted (e.g., study size, PICOS, follow-up period) and provide the citations.                                                             | 5-6                             |
| Risk of bias within studies   | 19 | Present data on risk of bias of each study and, if available, any outcome level assessment (see item 12).                                                                                                | n.a. -> Assessment of Abstracts |
| Results of individual studies | 20 | For all outcomes considered (benefits or harms), present, for each study: (a) simple summary data for each intervention group (b) effect estimates and confidence intervals, ideally with a forest plot. | n.a. -> Assessment of Abstracts |
| Synthesis of results          | 21 | Present results of each meta-analysis done, including confidence intervals and measures of consistency.                                                                                                  | n.a. -> Assessment of Abstracts |
| Risk of bias across studies   | 22 | Present results of any assessment of risk of bias across studies (see Item 15).                                                                                                                          | n.a. -> Assessment of Abstracts |
| Additional analysis           | 23 | Give results of additional analyses, if done (e.g., sensitivity or subgroup analyses, meta-regression [see Item 16]).                                                                                    | 8-9                             |
| <b>DISCUSSION</b>             |    |                                                                                                                                                                                                          |                                 |
| Summary of evidence           | 24 | Summarize the main findings including the strength of evidence for each main outcome; consider their relevance to key groups (e.g., healthcare providers, users, and policy makers).                     | 12-14                           |
| Limitations                   | 25 | Discuss limitations at study and outcome level (e.g., risk of bias), and at review-level (e.g., incomplete retrieval of identified research, reporting bias).                                            | 11-12                           |
| Conclusions                   | 26 | Provide a general interpretation of the results in the context of other evidence, and implications for future research.                                                                                  | 15                              |



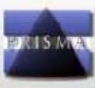

# PRISMA 2009 Checklist

1  
2  
3  
4  
5  
6  
7  
8  
9  
10  
11  
12  
13  
14  
15  
16  
17  
18  
19  
20  
21  
22  
23  
24  
25  
26  
27  
28  
29  
30  
31  
32  
33  
34  
35  
36  
37  
38  
39  
40  
41  
42  
43  
44  
45  
46  
47

| FUNDING |    |                                                                                                                                            |           |
|---------|----|--------------------------------------------------------------------------------------------------------------------------------------------|-----------|
| Funding | 27 | Describe sources of funding for the systematic review and other support (e.g., supply of data); role of funders for the systematic review. | III<br>11 |

From: Moher D, Liberati A, Tetzlaff J, Altman DG, The PRISMA Group (2009). Preferred Reporting Items for Systematic Reviews and Meta-Analyses: The PRISMA Statement. PLoS Med 6(7): e1000097. doi:10.1371/journal.pmed1000097

For more information, visit: [www.prisma-statement.org](http://www.prisma-statement.org).

For peer review only

# BMJ Open

## Assessment of reporting quality in randomized controlled clinical trial abstracts of dental implantology published from 2014 – 2016

|                                 |                                                                                                                                                                                                                                                                                                                                                                                                                                                                                                                                                                                                                |
|---------------------------------|----------------------------------------------------------------------------------------------------------------------------------------------------------------------------------------------------------------------------------------------------------------------------------------------------------------------------------------------------------------------------------------------------------------------------------------------------------------------------------------------------------------------------------------------------------------------------------------------------------------|
| Journal:                        | <i>BMJ Open</i>                                                                                                                                                                                                                                                                                                                                                                                                                                                                                                                                                                                                |
| Manuscript ID                   | bmjopen-2020-045372.R1                                                                                                                                                                                                                                                                                                                                                                                                                                                                                                                                                                                         |
| Article Type:                   | Original research                                                                                                                                                                                                                                                                                                                                                                                                                                                                                                                                                                                              |
| Date Submitted by the Author:   | 18-Mar-2021                                                                                                                                                                                                                                                                                                                                                                                                                                                                                                                                                                                                    |
| Complete List of Authors:       | Knippschild, Stephanie; University Witten Herdecke Faculty of Health, Institute for Medical Biometry and Epidemiology<br>Loddenkemper, Jeremias; University Witten Herdecke Faculty of Health, Institute for Medical Biometry and Epidemiology<br>Tulka, Sabrina; University Witten Herdecke Faculty of Health, Institute for Medical Biometry and Epidemiology,<br>Loddenkemper, Christine; University Witten Herdecke Faculty of Health, Institute for Medical Biometry and Epidemiology<br>Baulig, Christine; University Witten Herdecke Faculty of Health, Institute for Medical Biometry and Epidemiology |
| <b>Primary Subject Heading</b>: | Dentistry and oral medicine                                                                                                                                                                                                                                                                                                                                                                                                                                                                                                                                                                                    |
| Secondary Subject Heading:      | Dentistry and oral medicine, Evidence based practice                                                                                                                                                                                                                                                                                                                                                                                                                                                                                                                                                           |
| Keywords:                       | ORAL & MAXILLOFACIAL SURGERY, ORAL MEDICINE, STATISTICS & RESEARCH METHODS                                                                                                                                                                                                                                                                                                                                                                                                                                                                                                                                     |
|                                 |                                                                                                                                                                                                                                                                                                                                                                                                                                                                                                                                                                                                                |

SCHOLARONE™  
Manuscripts



I, the Submitting Author has the right to grant and does grant on behalf of all authors of the Work (as defined in the below author licence), an exclusive licence and/or a non-exclusive licence for contributions from authors who are: i) UK Crown employees; ii) where BMJ has agreed a CC-BY licence shall apply, and/or iii) in accordance with the terms applicable for US Federal Government officers or employees acting as part of their official duties; on a worldwide, perpetual, irrevocable, royalty-free basis to BMJ Publishing Group Ltd ("BMJ") its licensees and where the relevant Journal is co-owned by BMJ to the co-owners of the Journal, to publish the Work in this journal and any other BMJ products and to exploit all rights, as set out in our [licence](#).

The Submitting Author accepts and understands that any supply made under these terms is made by BMJ to the Submitting Author unless you are acting as an employee on behalf of your employer or a postgraduate student of an affiliated institution which is paying any applicable article publishing charge ("APC") for Open Access articles. Where the Submitting Author wishes to make the Work available on an Open Access basis (and intends to pay the relevant APC), the terms of reuse of such Open Access shall be governed by a Creative Commons licence – details of these licences and which [Creative Commons](#) licence will apply to this Work are set out in our licence referred to above.

Other than as permitted in any relevant BMJ Author's Self Archiving Policies, I confirm this Work has not been accepted for publication elsewhere, is not being considered for publication elsewhere and does not duplicate material already published. I confirm all authors consent to publication of this Work and authorise the granting of this licence.

1  
2  
3 **Assessment of reporting quality in randomized controlled clinical trial abstracts**  
4  
5 **of dental implantology published from 2014 – 2016**  
6  
7  
8  
9

10 **Short title:** Reporting quality in RCT abstracts of dental implantology  
11  
12  
13

14 Stephanie Knippschild<sup>1</sup>, Jeremias Loddenkemper<sup>1</sup>, Sabrina Tulka<sup>1</sup>, Christine  
15  
16 Loddenkemper<sup>1</sup>, Christine Baulig<sup>1</sup>  
17  
18  
19

20  
21 **Affiliation of all authors:**  
22

23  
24 <sup>1</sup>Institute for Medical Biometry and Epidemiology  
25  
26 Faculty of Health, Witten/Herdecke University  
27  
28 Alfred Herrhausen Straße 50, D-58448 Witten (Germany)  
29  
30  
31

32  
33 **Corresponding author:**  
34

35 Dr. rer. medic. Stephanie Knippschild  
36  
37 Institute for Medical Biometry and Epidemiology  
38  
39 Faculty of Health, Witten/Herdecke University  
40  
41 Alfred Herrhausen Straße 50, D-58448 Witten (Germany)  
42  
43  
44 Phone: ++ 49 (0)2302 926 763  
45  
46 Fax: ++ 49 (0)2302 926 44785  
47  
48  
49 [stephanie.knippschild@uni-wh.de](mailto:stephanie.knippschild@uni-wh.de)  
50  
51  
52

53 **Word count:** 4846  
54  
55  
56  
57

58 **Keywords:** quality, abstracts, CONSORT, CONSORT-A  
59  
60

1  
2  
3 **Objectives:** Access to full texts of randomized controlled clinical trials (RCTs) is often  
4 limited, so brief summaries of studies play a pivotal role. In 2008, a checklist was  
5 provided to ensure the transparency and completeness of abstracts. The aim of this  
6 investigation was to estimate adherence to the reporting guidelines of the CONSORT  
7 criteria for abstracts (CONSORT-A) in RCT publications.  
8  
9

10  
11  
12 **Primary endpoint:** Assessment according to the percentage of compliance with the  
13 16 CONSORT-A criteria per study.  
14

15  
16  
17 **Materials and methods:** This study is based on a full survey (212 RCT abstracts in  
18 dental implantology, PubMed search, publication period 2014–2016, 45 journals,  
19 median impact factor: 2.328). In addition to merely documenting “adherence” to  
20 criteria, the authors also assessed the “complete implementation” of the requested  
21 information where possible. The collection of data was performed independently by  
22 two dentists, and a final consensus was reached. The primary endpoint was evaluated  
23 by medians and quartiles. Additionally, a Poisson regression was conducted to detect  
24 influencing factors.  
25  
26  
27  
28  
29  
30  
31  
32  
33  
34  
35  
36  
37  
38

39 **Results:** A median of 50% [Q1-Q3: 44%-63%] was documented for the 16 criteria  
40 listed in the CONSORT-A statement. Nine of the 16 criteria were considered in fewer  
41 than 50% of the abstracts. “Correct implementation” was achieved for a median of 43%  
42 (Q1-Q3: 31%-50%) of the criteria. An additional application of Poisson regression  
43 revealed that the number of words used had a locally significant impact on the number  
44 of reported CONSORT criteria for abstracts (IRR 1.001, 95% CI 1.001 to 1.002).  
45  
46  
47  
48  
49  
50  
51

52  
53 **Conclusion:** Transparent and complete reporting in abstracts appears problematic. A  
54 limited word count seems to result in a reduction in necessary information. As current  
55 scientific knowledge is often not readily available in the form of publications, abstracts  
56 constitute the primary basis for decision-making in clinical practice and research. This  
57  
58  
59  
60

1  
2  
3 is why journals should refrain from limiting the number of words too strictly in order to  
4  
5 facilitate comprehensive reporting in abstracts.  
6  
7  
8  
9  
10

## 11 **Strengths and limitations of this study**

### 14 **1. Literature search**

16 We searched one electronic database – PubMed – because it comprises more than 30 million  
17 citations for biomedical literature from MEDLINE and has been declared the world's largest  
18 and most important medical bibliographic database.  
19

### 21 **2. Data extraction**

22 Two dentists reviewed the abstracts in parallel and independently of each other; the final set  
23 of data was produced in consensus.  
24  
25

### 27 **3. Reporting quality by assessing the adherence and correct implementation of the CONSORT 28 statement**

29 This approach - for assessing the reporting quality - is new in the field of dental implantology;  
30 in addition to merely documenting “adherence” to criteria, the authors also assessed “correct  
31 implementation” of the requested information.  
32  
33  
34  
35  
36  
37  
38

## 39 **Funding**

40  
41 This research received no specific grant from any funding agency in the public, commercial or  
42 nonprofit sectors.  
43  
44  
45  
46  
47  
48  
49  
50  
51  
52  
53  
54  
55  
56  
57  
58  
59  
60

## **Assessment of reporting quality in randomized controlled clinical trial abstracts of dental implantology published from 2014 – 2016**

### **Background and Objective**

Transparent and comprehensive reporting forms the basis for the evaluation and interpretation of published scientific findings. The EQUATOR network currently provides a total of 425 guidelines on reporting in health research to improve the quality of reporting in health care studies[1]. The CONSORT statement contains recommendations for reporting randomized controlled clinical studies (RCTs) that present the highest evidence level (Ib) and serve as a basis for recommendations and therapy decisions derived from these trials in daily clinical routines as well as evidence-based practice. The CONSORT group has developed guidelines for a variety of study designs, interventions and data and makes checklists available to authors to be used in the preparation of publications[2]. A specific checklist to generate abstracts has been available since 2008, as this part of a publication plays a key role: researchers and physicians worldwide use information from abstracts of publications to assess the relevance and further exploitation of a scientific paper. An abstract, i.e., a publication in miniature format, should, therefore, convey all necessary information from a scientific study.

A look at the current literature reveals differences among published abstracts in terms of completeness, structure and scope, despite existing and freely available guidelines. Reporting is frequently nontransparent and incomplete, which inevitably leads to two problems:

1  
2  
3  
4  
5  
6  
7  
8  
9  
10  
11  
12  
13  
14  
15  
16  
17  
18  
19  
20  
21  
22  
23  
24  
25  
26  
27  
28  
29  
30  
31  
32  
33  
34  
35  
36  
37  
38  
39  
40  
41  
42  
43  
44  
45  
46  
47  
48  
49  
50  
51  
52  
53  
54  
55  
56  
57  
58  
59  
60

1. **Fragmented and incomplete abstract reporting of study results prevents decision-making about therapies in daily clinical routines.**

Due to increasing time constraints in hospitals and a rapidly growing number of published study results, many interested individuals only have time to read the abstracts[3]. On this basis, they need to decide for or against the inspection or acquisition of full texts and possibly for or against a therapy.

Even though it is strongly advised to include the full texts for decision-making, there may be circumstances in which this advice cannot always be followed. This is also regularly described in publications[4]. In regions with fewer health care resources, in particular, limited, chargeable and expensive access to full texts forces medical staff to make treatment decisions exclusively on the basis of abstracts[5]. This leads to a high risk of mistakes with possibly far-reaching consequences for patients.

2. **Fragmented and incomplete abstract reporting of study results complicates the compilation of reviews, meta-analyses and evidence-based information in medicine.**

In 2021, Lund et al. published the following key finding: “An evidence-based research approach – the use of existing evidence in a transparent and explicit way – is needed to justify the need for and design a new study”[6]. Especially in projects with moderate or no funding, a literature search is followed by abstract screening to identify relevant literature and to reduce the costs for the procurement of literature to a minimum. Non-transparent or fragmentary reporting in abstracts entails the risk that relevant study reports will not be considered since the presentation of the results may be incomplete, incorrect or



1  
2  
3 selective. Relevant studies could not be found for the preparation of reviews  
4 and meta-analyses. This effect is especially critical for the drafting of  
5 recommendations, where RCT reporting is used for an evidence-based  
6 presentation of the results. As a consequence of unclear and incomplete  
7 reporting, it cannot be excluded that articles of importance to the formulation of  
8 therapeutic guidelines are not identified and therefore not considered.  
9  
10  
11  
12  
13  
14  
15  
16  
17

18 These problems are widespread in publications on various clinical indications[7-10]. In  
19 oral implantation, we found one publication that assessed the reporting quality in  
20 abstracts of randomized controlled trials[11]. This study determined a mean overall  
21 reporting quality score of 58.6% in RCTs by focusing on six leading implantology  
22 journals between 2008 and 2012. Our investigation aimed to provide updated results  
23 to identify the extent to which authors in the field comply with recommendations  
24 provided in the CONSORT statement for the compilation of transparent and complete  
25 abstracts. The objective was to check RCT publications in dental implantology (2014-  
26 2016) for information as requested by the CONSORT statement for abstracts.  
27  
28  
29  
30  
31  
32  
33  
34  
35  
36  
37  
38  
39  
40  
41

## 42 **Materials and Methods**

43  
44 The authors of this study examined abstracts of published study reports in dental  
45 implantology for compliance with 16 criteria recommended by CONSORT-A[12]. The  
46 objective was to identify the degree – by percent and per study – to which all criteria  
47 requested in CONSORT-A were adhered to (primary endpoint). Secondary research  
48 questions served to identify possible factors via regression analysis, which may result  
49 in a better implementation of CONSORT criteria. These criteria were also assessed in  
50 terms of their correct and meaningful documentation. Assessment was conducted in  
51 two steps. For an assessment of the “degree of adherence I”, the focus was exclusively  
52  
53  
54  
55  
56  
57  
58  
59  
60

1  
2  
3 on the documentation (retrievability) of information in abstracts as requested by  
4 CONSORT-A. For an assessment of the degree of adherence II, correctness and  
5 completeness as required by CONSORT-A[2, 12, 13] were evaluated. It was only  
6 possible to collect this information for 6 out of 16 criteria since an assessment of  
7 correctness would not have made sense for the remaining criteria. Assessment of the  
8 “degree of adherence II” is based on requirements defined in the CONSORT-A  
9 statement,[12] as well as on information required in “Explanation and Elaboration”[13].  
10 The latter provides a clear description of reporting on individual criteria in several  
11 subsections. An assessment in terms of requirements for the degree of adherence II  
12 was possible for six criteria (see Supplementary Table 1).

13  
14  
15  
16  
17  
18  
19  
20  
21  
22  
23  
24  
25  
26 A literature search of the publication period 01/2014 to 12/2016 via the PubMed search  
27 engine of the MEDLINE medical database formed the basis for the analysis. We  
28 performed a very unrestricted search to obtain as many hits as possible. For this  
29 purpose, the keywords “dental implantation”, “dental implant” and “tooth artificial” were  
30 combined with the logical operator OR. The type of study was restricted to randomized  
31 controlled clinical trials (RCTs) (Supplementary Table 2). The software programme  
32 Excel[14] was used to compile data, and the data mask was generated on the basis of  
33 the CONSORT statement for abstracts[12].

34  
35  
36  
37  
38  
39  
40  
41  
42  
43  
44  
45  
46  
47  
48  
49  
50  
51  
52  
53  
54  
55  
56  
57  
58  
59  
60  
At the start of the project, a tool for evaluating abstract quality was available from a  
preceding study[8], which had to be slightly adapted and extended for the purposes of  
this investigation by its planners. All 16 CONSORT-A criteria were included in data  
compilation and analysis. General information on each publication was documented to  
facilitate a clear classification of reports at a later time, as well as additional data to be  
examined for their potential impact on reporting quality (year of publication, “structured”  
or “unstructured” presentation of the abstract, the number of patients included, the  
word count and the impact factor of the respective journal).

1  
2  
3 Two dentists reviewed the abstracts in parallel and independently of each other. The  
4  
5 final data set was drawn up in consensus (JL, CL). Data analysis was performed using  
6  
7 the SPSS Statistics 24 software programme (SK, CB)[15]. The authors determined  
8  
9 relative frequencies and interquartile ranges for study-related implementation rates  
10  
11 and for the implementation of individual criteria. The results at the primary endpoint  
12  
13 are depicted in box plots. Criteria-related frequencies are illustrated with bar charts[14].  
14  
15  
16

17  
18  
19 Possible factors influencing the quality of the abstracts measured by the number of  
20  
21 criteria fulfilled per publication were identified by means of an additional explorative  
22  
23 data analysis via Poisson regression (ST). Backward variable selection was performed  
24  
25 with the Akaike information criterion (AIC). Incidence rate ratios (IRRs), including 95%  
26  
27 confidence intervals and respective p-values determined via the Wald test, were used  
28  
29 to describe the impact. Year of publication (reference: 2014), presence of a structured  
30  
31 abstract (reference: no), number of patients analysed, impact factor and word count  
32  
33 were examined as potential influencing factors. The analysis was conducted using the  
34  
35 software programme R (R Core Team, 2015).  
36  
37  
38  
39  
40  
41

#### 42 **Patient and public involvement:**

43  
44 No patients were directly involved.  
45  
46  
47  
48

## 49 **Results**

### 50 **Research results**

51  
52 The electronic search yielded a data pool of 262 reports, 40 abstracts of which had to  
53  
54 be excluded after a first screening due to a mismatch in disciplines. Ten additional  
55  
56 abstracts were excluded because the publications in question did not report clinical  
57  
58  
59  
60

studies. As a result, a total of 212 abstracts from RCT publications (see Fig. 1) were included in this study.

### General study characteristics and journals

The analysis included RCT abstracts from 45 journals (see Supplementary Table 3) with a median IF of 2.3280 (min. 0, max. 5.62). Two journals, the “European Journal of Implantology” (36 of 212 abstracts; 17%) and “Clinical oral implants research” (36 of 212 abstracts; 17%), accounted for approximately one-third of the abstracts. Table 1 shows the general study characteristics for the data pool evaluated. Most of the information was available in a structured form (174/212; 82%) with a median of 258 words (min. 94 words[16] and max. 659 words[17]). The abstracts reported case numbers ranging from 10[18-20] and 360[21] from published studies. The median number of study participants was 36.

| Study characteristics             | Frequencies                                                |           |
|-----------------------------------|------------------------------------------------------------|-----------|
| Form of abstract                  | structured                                                 | 174 (82%) |
|                                   | unstructured                                               | 38 (18%)  |
| Year of publication               | 2014                                                       | 101 (48%) |
|                                   | 2015                                                       | 74 (35%)  |
|                                   | 2016                                                       | 37 (17%)  |
| Journals                          | European Journal of Oral Implantology                      | 36 (17%)  |
|                                   | Clinical oral implants research                            | 36 (17%)  |
|                                   | The International Journal of Oral & Maxillofacial Implants | 23 (11%)  |
|                                   | Clinical implant dentistry and related research            | 22 (11%)  |
|                                   | other                                                      | 95 (45%)  |
| Provenance                        | Europe                                                     | 70 (33%)  |
|                                   | America                                                    | 21 (10%)  |
|                                   | Africa                                                     | 6 (3%)    |
|                                   | Asia                                                       | 35 (17%)  |
|                                   | Not specified                                              | 80 (38%)  |
| Word count (median)               | 258 [Min. 94; Max. 659]                                    |           |
| Number of cases analysed (median) | 36 [Min. 10; Max. 360]                                     |           |
| Impact factor (median)            | 2.3280 [Min. 0; Max. 5.62]                                 |           |

Table 1: Study characteristics of 212 RCT abstracts of implantology in terms of the frequency [N] and relative frequency (%).

## Implementation rate per study

The studies included showed a median implementation of CONSORT-A recommendations (degree of adherence I) of 50% (Q1-Q3 43.8% to 62.5%) per abstract, whereby eight out of 16 criteria were documented (min. 7, max. 14 criteria); see also Supplementary Figure 1. The criterion with the highest percentage of documentation was “intervention” (100%). A documentation of less than 10% was found for “trial registration” and “funding” (see Table 2).

| CONSORT criterion                                 | Implementation N (%)<br>Degree of adherence I | Implementation N (%)<br>Degree of adherence II |
|---------------------------------------------------|-----------------------------------------------|------------------------------------------------|
| Identification as a randomized trial in the title | 95 (45)                                       | 95 (45)*                                       |
| Trial design                                      | 66 (31)                                       | 66 (31) *                                      |
| Participant characteristics                       | 154 (73)                                      | 154 (73) *                                     |
| Interventions                                     | 212 (100)                                     | 200 (94)                                       |
| Objective                                         | 209 (99)                                      | 209 (99) *                                     |
| Definition primary endpoint                       | 198 (93)                                      | 117 (55)                                       |
| Randomization                                     | 35 (17)                                       | 13 (6)                                         |
| Blinding                                          | 41 (19)                                       | 21 (10)                                        |
| Numbers randomised                                | 97 (46)                                       | 97 (46) *                                      |
| Recruitment                                       | 196 (93)                                      | 196 (93) *                                     |
| Numbers analysed                                  | 57 (27)                                       | 57 (27)*                                       |
| Results of Outcome                                | 207 (98)                                      | 133 (63)                                       |
| Harms                                             | 23 (11)                                       | 23 (11) *                                      |
| Conclusion                                        | 204 (96)                                      | 47 (22)                                        |
| Trial Registration                                | 10 (5)                                        | 10 (5) *                                       |
| Funding                                           | 8 (4)                                         | 8 (4) *                                        |
| <b>Total</b>                                      |                                               |                                                |

Table 2: Implementation N [%] of CONSORT criteria for abstracts in 212 reports of published RCTs in the field of implantology. Presentation of the degree of adherence I (information given in the abstract) and degree of adherence II (correct documentation in accordance with CONSORT-A). \* Variables without a formal degree of adherence II.

In terms of correct implementation (degree of adherence II), a median implementation of 40.6% (6.5 criteria) was found with an interquartile range of 31.3% to 50.0%. One abstract[22] revealed the lowest implementation with only the “Objective” criterion

1  
2  
3 (6.25%), whereas Esposito et al., 2014 documented a maximum number of 13 criteria  
4  
5 (81.25%).  
6

7 For the “randomization” (documentation 17%, correct implementation 6%) and  
8  
9 “conclusion” (documentation 96%, correct implementation 22%) criteria, the authors  
10  
11 found a decrease of  $\geq 50\%$  in the implementation rate from the degree of adherence I  
12  
13 to the degree of adherence II (see Table 2).  
14  
15  
16

## 17 18 19 **Implementation rates per criterion**

### 20 21 *General criteria*

22  
23 Among the 212 abstracts included, 45% mentioned RCTs as the study design in the  
24  
25 title of the study (95/212). Thirty-one percent provided a more detailed description of  
26  
27 the study design, such as parallel group studies, blinded studies, and placebo-  
28  
29 controlled studies (66/212).  
30  
31  
32

### 33 34 35 *Methods*

36  
37 The “aim of the study” was documented in 99% of the abstracts examined (209/212).  
38  
39 Information on the “primary endpoint” was given in 93% (198/212); this information  
40  
41 was, however, clearly defined in only 55% (117/212), including specification of the  
42  
43 measurement variable. “Eligibility criteria for participants and the settings” were found  
44  
45 in 73% (154/212) of the abstracts, while complete documentation of the “intervention  
46  
47 for each group” was found in all 212 abstracts (100%). Ninety-four percent (200/212)  
48  
49 reported a detailed description of the intervention for each group. Random allocation  
50  
51 of participants to the intervention group was documented in 17% (35/212) of cases;  
52  
53 only 6% (13/212) of abstracts contained data on the generation of the random  
54  
55 sequence and its implementation. Nineteen percent (41/212) of abstracts mentioned  
56  
57 blinding prior to the study; 10% (21/212) also indicated blinded groups of participants.  
58  
59  
60

## Results

In terms of result presentation, 93% (196/212) of abstracts provided information on the current status of the study (study completed, interim analysis after xy years). The number of randomized participants was given in 46% (97/212) of abstracts and in 27% (57/212) of the analysed participants. A total of 98% (207/212) of abstracts included reported results at the primary endpoint, but only 63% (133/212) of abstracts contained a precise effect size. Eleven percent (23/212) of the examined RCT abstracts documented major (significant) harms. Ninety-six percent (204/212) provided a general summary of the results; only 22% (47/212) described the strengths and deficits of the respective study. The registration ID was documented in 5% (10/212) of the abstracts, and information on funding was documented in 4% (8/212).

The additional explorative analysis by means of Poisson regression included 199 out of 212 abstracts, since 13 abstracts did not provide information on all potential influencing factors. For both degrees of adherence – I and II – the number of words used was shown to have a locally significant impact on the number of reported CONSORT abstract criteria (degree of adherence I: IRR 1.001, 95% CI 1.001 to 1.002; degree of adherence II: IRR 1.002, 95% CI 1.001 to 1.003). The percentages of explained variance according to Nagelkerke's  $R^2$  were 14% and 21%, respectively. The other possible influencing variables – year of publication, presence of a structured abstract, number of patients included and impact factor – were not selected in the backward variable selection via AIC and had no significant influence on the number of reported CONSORT-A criteria.

## Discussion

1  
2  
3 This study examined the degree to which recommendations of the CONSORT  
4 statement for abstracts were implemented in trial publications on dental implantology.  
5  
6 A total of 212 abstracts published 2014 to 2016 showed a median documentation of  
7  
8 the required criteria (degree of adherence I) of only 50%. When focusing on “correct”  
9  
10 compliance with the requirements of the statement (in this context: degree of  
11  
12 adherence II), adherence declined to 40.6% (see Fig. 2 and Table 2).  
13  
14  
15  
16  
17  
18

19 A comparison of all criteria revealed that the two criteria, “funding” and “trial  
20 registration”, were rarely documented (5% and 4%, respectively). In general, journal  
21  
22 editors request these details separately, and they are mentioned in the publication but  
23  
24 quite often not in the abstract.  
25  
26  
27

28 In addition, the content of abstracts is often massively reduced by word count  
29  
30 limitations requested by the publishers. A Poisson regression analysis conducted for  
31  
32 the purposes of this study showed that word count limits were responsible for lesser  
33  
34 reporting quality or missing details in abstracts (IRR 1.001, 95% CI 1.001 to 1.002).  
35  
36 The influence of the number of words used in the abstract was documented in a  
37  
38 previous study by Baulig et al. (N=136) (Poisson regression-based IRR 1.002, 95% CI  
39  
40 1.001 to 1.003). This previous study explored the abstract quality in ophthalmology  
41  
42 RCTs on age-related macular degeneration. The analysis revealed a median  
43  
44 implementation of seven criteria (95% CI 7 to 8)[8]. The results are similar to those  
45  
46 found in the present study in the field of dental implantology. In 2020, Xie et al. also  
47  
48 investigated the quality of 249 randomized controlled trial abstracts published in dental  
49  
50 science[23]. They found major gaps in the documentation of general items (5.6%  
51  
52 documented trial registration), methods (only one publication, i.e., 0.4%, noted the  
53  
54 sequence generation procedure for randomization and allocation concealment; in 7.6%  
55  
56 of the papers reviewed, blinding was described; and a clearly stated primary outcome  
57  
58  
59  
60



1  
2  
3 was documented in only 16.9%), trial results (the number of participants analysed was  
4 only described in 8.8%, and adverse events were described in only 14.9%). As in our  
5 study, this research group also found a significant association between word count  
6 requirements and reporting quality (multivariable linear regression ( $B=0.020$ ;  $P<0.001$ )).  
7  
8 Notwithstanding any word count limitations, minor additional information (such as  
9 registration ID, identification as RCT in the title, specification of patient numbers at  
10 randomization or analysis) can be included in the text (e.g., numbers in brackets)  
11 without the need for more words. Such inclusions provide important information on  
12 indexing or for the benefit of readers and improve the transparency required for  
13 abstracts. A publication by Berwanger et al.[24] offers an excellent template for  
14 transparent and comprehensive reporting in abstracts even if the word count has been  
15 restricted.

16  
17 The assessment of the documentation of the CONSORT-A criteria in this paper is  
18 based exclusively on abstracts. Original texts (full texts) or information provided  
19 outside the abstract text were not examined and were not taken into consideration.  
20 Since the two criteria “funding” and “trial registration” do not necessarily have to be  
21 included in the abstract and a subjective presentation of the implementation ratio might  
22 be a consequence, to the detriment of the authors’ duty of documentation, an additional  
23 data evaluation seemed advisable, based on only 14 criteria after excluding the  
24 “funding” and “trial registration” criteria. This further evaluation yielded a somewhat  
25 higher “implementation ratio” for the degree of adherence I of 57.1% with an  
26 interquartile range of 50.5% to 71.4% (see Supplementary Fig. 2). For the degree of  
27 adherence II, the authors still found a reduced implementation ratio of 42.9% (Q1-Q3;  
28 35.7% - 57.1%). A median of eight criteria (interquartile range 7-10 criteria) was  
29 documented, and six criteria were correctly implemented (interquartile range 5-8  
30 criteria). It was, however, obvious from both data pools (14 vs. 16 criteria) that a far

1  
2  
3 smaller number of CONSORT-A criteria were identified as having been included when  
4 correct implementation was examined in addition to mere documentation (see  
5  
6  
7  
8 Supplementary Fig. 3).  
9

10  
11  
12 A data analysis of 14 CONSORT-A criteria by means of Poisson regression also  
13 revealed a locally significant influence of the abstract word count on the quality of  
14  
15  
16  
17 abstracts (degree of adherence I: IRR 1.001, 95% CI 1.001 to 1.002,  $p < 0.001$ ; degree  
18  
19  
20 of adherence II: IRR 1.002, 95% CI 1.001 to 1.003,  $p < 0.001$ ). The percentage of  
21  
22  
23 explained variance according to Nagelkerke's  $R^2$  was 13% and 20%, respectively.  
24  
25  
26 Other possible influencing variables, i.e., year of publication, availability of a structured  
27  
28  
29 abstract, number of patients included and impact factor were again not selected in the  
30  
31  
32 backward selection via AIC and had no significant impact on the number of CONSORT-  
33  
34  
35 A criteria reported in the abstracts included.

36  
37 Findings from a doctoral project were presented in the context of this study; the project  
38  
39  
40 in question did not receive any financial support or assistance. A literature search was  
41  
42  
43 therefore exclusively conducted by means of the internet-based literature database  
44  
45  
46 PubMed with a total of over 30 million quotations for biomedical literature from  
47  
48  
49 MEDLINE, life science journals and online books that were directly available free of  
50  
51  
52 charge to all researchers involved. When interpreting the findings of this study, readers  
53  
54  
55 should therefore be aware that the inclusion of only one database might lead to a bias  
56  
57  
58 of results (deviation in the estimated degree of implementation).

59  
60 However, we assume that only a few publications could have been found when  
searching additional databases, as PubMed includes all relevant implantology journals.  
The evaluation of congress abstracts, which might have been found in Embase, were  
explicitly not part of this investigation. In this respect, the authors assumed that the

1  
2  
3 results would not have been significantly improved if a few additional studies had been  
4 considered in this analysis. The search was limited in time to the three-year period  
5 from 01/2014 - 12/2016. Up to 2012, implantological abstracts had been examined by  
6 Kiriakou et al. A follow-up examination should therefore be carried out on more recent  
7 studies.  
8  
9

10  
11  
12 To minimize bias on the part of the evaluators, two researchers / physicians performed  
13 the analysis in parallel and independently of each other. Abstract evaluation was based  
14 on .txt files that were generated directly in PubMed after completing the search  
15 operation. This strategy ensured that all abstracts were available in the same visual  
16 form and ruled out any influence due to the graphical representation of the abstracts.  
17  
18 However, evaluators were not blinded with respect to the journals, authors and  
19 publication periods, so a possible assessor bias can be assumed.  
20  
21  
22  
23  
24  
25  
26  
27  
28  
29  
30

31  
32  
33 The calculation of Cohen's kappa shows a high conformity between the assessors for  
34 eight out of 16 criteria (see Supplementary Table 4). With a focus on the percentage  
35 of correlation, the lowest degree of conformity between assessors was identified for  
36 the "harms" criterion (62%;  $\kappa=0.041$ ). Information on this aspect may possibly be more  
37 or less deduced from the abstract (if one reads between the lines) and is not always  
38 explicitly presented as health disadvantages for patients. An evaluation of abstract  
39 quality performed in a previous study in the field of ophthalmology (Baulig et al., 2018)  
40 served as a basis for the present study in terms of the assessment tool, evaluation  
41 procedure and the evaluation so that no study protocol was deemed necessary for the  
42 present study.  
43  
44  
45  
46  
47  
48  
49  
50  
51  
52  
53  
54

55  
56  
57  
58 Several publications on other clinical indications with similar research questions  
59 confirmed our results for the general implementation of criteria. Gallo et al. analysed  
60

1  
2  
3 126 abstracts from 2011 to 2018 for the rate of implementation. The authors found that  
4  
5 in general, seven criteria (SD  $\pm$ 2) were considered per publication. "Trial registration",  
6  
7 "method of randomization" and "source of trial funding" were documented with a  
8  
9 frequency of less than 5%[25]. Chow et al. reported on adherence to CONSORT  
10  
11 criteria in 395 abstracts in the field of anaesthesiology. Their study documented that  
12  
13 75% of these abstracts from RCTs published in 2016 met less than half of the 16  
14  
15 criteria. In line with the present study, their examination revealed that not a single one  
16  
17 of the included publications took all 16 CONSORT criteria for abstracts into  
18  
19 consideration. An implementation rate of < 50% was found for the following criteria:  
20  
21 "designation in the title", "study design", "baseline data", "objective", "randomization",  
22  
23 "blinding", "number of randomized participants", "outcome", "registration" and  
24  
25 "funding"[26]. Speich et al. explored the abstract quality in published study reports from  
26  
27 the field of surgery (2014 – 2016)[27]. They found a general implementation of eight  
28  
29 criteria (95% CI 7.83 - 8.39), with "randomization", "blinding" and "funding" have been  
30  
31 considered in less than 20%.

32  
33 The abovementioned reports are consistent with the present study in terms of the low  
34  
35 number of criteria met, as well as of those criteria for which the lowest degree of  
36  
37 adherence was found. The authors criticize in particular the documentation of  
38  
39 "randomization", "blinding" and "number of randomized/analysed participants". The  
40  
41 "Explorations & Elaborations" section describes in detail how the 16 required  
42  
43 CONSORT-A criteria contribute to the completeness and sufficient transparency of an  
44  
45 abstract, with the relevance of individual criteria and their processing not being under  
46  
47 discussion in this context. The literature provides no clues as to a possibly larger or  
48  
49 smaller impact of criteria on reporting quality. However, future studies should consider  
50  
51 a weighting of required criteria, with the possible consequence that future studies can  
52  
53 present the degree of implementation in a more objective manner.  
54  
55  
56  
57  
58  
59  
60

1  
2  
3 In addition to the poor documentation of the “blinding”, “randomization” and “harms”  
4  
5 criteria, our study revealed additional massive deficits in the documentation of  
6  
7 “definition of primary endpoint”, “results/outcomes” and “conclusion” (see Table 2 and  
8  
9 Fig. 3). In the evaluation of “correctness”, the degree of adherence declined by at least  
10  
11 30%, since pertinent information was documented in the abstract but not in the manner  
12  
13 required by CONSORT-A. Deficits in the implementation of CONSORT-A  
14  
15 recommendations therefore tend to occur more frequently for the methodological  
16  
17 criteria, as was previously confirmed by Ghimire et al.  
18  
19

20  
21 This research team reports a documentation of randomization (“Allocation  
22  
23 Concealment”) in only 12% of abstracts and of blinding in only 21%[28]. Obviously,  
24  
25 there are criteria that authors adhere to in general, and a few others (statistical criteria)  
26  
27 that are reported infrequently. It can be assumed that a large number of individuals are  
28  
29 involved in the compilation of an abstract (publication), so that different text sections  
30  
31 are inevitably drawn up in different contexts while applying different quality standards  
32  
33 (transparency and completeness). This may explain deficits in specific areas. Deficits  
34  
35 in statistical aspects in particular might be reduced by involving medical  
36  
37 statisticians/biometricians in the compilation of publications and during the review  
38  
39 process.  
40  
41  
42  
43

44  
45 To date, some investigations have been conducted on reporting quality in abstracts in  
46  
47 dental research. Flemming et al. reported an overall reporting quality score of 60.2%  
48  
49 in abstracts of five orthodontic journals from 2006 to 2011[29]. For this evaluation, 117  
50  
51 RCT abstracts were assessed by using a modified CONSORT for abstract checklists  
52  
53 containing 21 items. In particular, the items “randomization procedures”, “allocation  
54  
55 concealment”, “blinding”, “failure to report confidence intervals” and “harms” were  
56  
57 found to be reported insufficiently. Seehra et al. published a mean overall reporting  
58  
59 quality in dental specialty journals of 62.5% (N= 228 RCT abstracts)[30]. The research  
60

1  
2  
3 group found that randomization restrictions, allocation concealment, blinding, numbers  
4 analysed, confidence intervals, intention-to-treat analysis, harms, registration and  
5 funding were rarely described. The research group from Faggion et al. compared the  
6 quality of reporting in abstracts between 2005-2007 and 2009-2011 in seven leading  
7 journals of periodontology and implant dentistry[31]. They included 392 abstracts in  
8 their review and found the quality of reporting to be improvable. Only the  
9 documentation of the title significantly improved over time.

10  
11  
12  
13  
14  
15  
16  
17  
18  
19 The reporting quality in abstracts of randomized controlled trials in oral implantology  
20 was assessed by Kiriakou et al. in 2012[11]. Therefore, six leading implantology  
21 journals were reviewed from 2008 to 2012. Abstracts were assessed as providing  
22 either “no description”, “inadequate description” or “adequate description”. The results  
23 showed a mean overall reporting quality score of 58.6% (95% CI: 57.6 – 59.7), with  
24 insufficient reporting of the randomization procedures and allocation concealment  
25 items. They also found failure in reporting confidence intervals, effect estimates and  
26 sources of funding.

27  
28  
29  
30  
31  
32  
33  
34  
35  
36  
37  
38 In contrast to existing investigations assessing abstract reporting quality in dentistry,  
39 we used CONSORT-A without modifying the number of items. However, we found a  
40 similar degree of implementation as the authors mentioned above. The new findings  
41 from our investigation clearly show that there is a difference between the  
42 implementation of guidelines and fully documented/correct implementation (50%  
43 implementation vs. 40.6% fully/correct implementation).

44  
45  
46  
47  
48  
49  
50  
51  
52  
53  
54  
55  
56  
57  
58  
59  
60  
61  
62  
63  
64  
65  
66  
67  
68  
69  
70  
71  
72  
73  
74  
75  
76  
77  
78  
79  
80  
81  
82  
83  
84  
85  
86  
87  
88  
89  
90  
91  
92  
93  
94  
95  
96  
97  
98  
99  
100  
101  
102  
103  
104  
105  
106  
107  
108  
109  
110  
111  
112  
113  
114  
115  
116  
117  
118  
119  
120  
121  
122  
123  
124  
125  
126  
127  
128  
129  
130  
131  
132  
133  
134  
135  
136  
137  
138  
139  
140  
141  
142  
143  
144  
145  
146  
147  
148  
149  
150  
151  
152  
153  
154  
155  
156  
157  
158  
159  
160  
161  
162  
163  
164  
165  
166  
167  
168  
169  
170  
171  
172  
173  
174  
175  
176  
177  
178  
179  
180  
181  
182  
183  
184  
185  
186  
187  
188  
189  
190  
191  
192  
193  
194  
195  
196  
197  
198  
199  
200  
201  
202  
203  
204  
205  
206  
207  
208  
209  
210  
211  
212  
213  
214  
215  
216  
217  
218  
219  
220  
221  
222  
223  
224  
225  
226  
227  
228  
229  
230  
231  
232  
233  
234  
235  
236  
237  
238  
239  
240  
241  
242  
243  
244  
245  
246  
247  
248  
249  
250  
251  
252  
253  
254  
255  
256  
257  
258  
259  
260  
261  
262  
263  
264  
265  
266  
267  
268  
269  
270  
271  
272  
273  
274  
275  
276  
277  
278  
279  
280  
281  
282  
283  
284  
285  
286  
287  
288  
289  
290  
291  
292  
293  
294  
295  
296  
297  
298  
299  
300  
301  
302  
303  
304  
305  
306  
307  
308  
309  
310  
311  
312  
313  
314  
315  
316  
317  
318  
319  
320  
321  
322  
323  
324  
325  
326  
327  
328  
329  
330  
331  
332  
333  
334  
335  
336  
337  
338  
339  
340  
341  
342  
343  
344  
345  
346  
347  
348  
349  
350  
351  
352  
353  
354  
355  
356  
357  
358  
359  
360  
361  
362  
363  
364  
365  
366  
367  
368  
369  
370  
371  
372  
373  
374  
375  
376  
377  
378  
379  
380  
381  
382  
383  
384  
385  
386  
387  
388  
389  
390  
391  
392  
393  
394  
395  
396  
397  
398  
399  
400  
401  
402  
403  
404  
405  
406  
407  
408  
409  
410  
411  
412  
413  
414  
415  
416  
417  
418  
419  
420  
421  
422  
423  
424  
425  
426  
427  
428  
429  
430  
431  
432  
433  
434  
435  
436  
437  
438  
439  
440  
441  
442  
443  
444  
445  
446  
447  
448  
449  
450  
451  
452  
453  
454  
455  
456  
457  
458  
459  
460  
461  
462  
463  
464  
465  
466  
467  
468  
469  
470  
471  
472  
473  
474  
475  
476  
477  
478  
479  
480  
481  
482  
483  
484  
485  
486  
487  
488  
489  
490  
491  
492  
493  
494  
495  
496  
497  
498  
499  
500  
501  
502  
503  
504  
505  
506  
507  
508  
509  
510  
511  
512  
513  
514  
515  
516  
517  
518  
519  
520  
521  
522  
523  
524  
525  
526  
527  
528  
529  
530  
531  
532  
533  
534  
535  
536  
537  
538  
539  
540  
541  
542  
543  
544  
545  
546  
547  
548  
549  
550  
551  
552  
553  
554  
555  
556  
557  
558  
559  
560  
561  
562  
563  
564  
565  
566  
567  
568  
569  
570  
571  
572  
573  
574  
575  
576  
577  
578  
579  
580  
581  
582  
583  
584  
585  
586  
587  
588  
589  
590  
591  
592  
593  
594  
595  
596  
597  
598  
599  
600  
601  
602  
603  
604  
605  
606  
607  
608  
609  
610  
611  
612  
613  
614  
615  
616  
617  
618  
619  
620  
621  
622  
623  
624  
625  
626  
627  
628  
629  
630  
631  
632  
633  
634  
635  
636  
637  
638  
639  
640  
641  
642  
643  
644  
645  
646  
647  
648  
649  
650  
651  
652  
653  
654  
655  
656  
657  
658  
659  
660  
661  
662  
663  
664  
665  
666  
667  
668  
669  
670  
671  
672  
673  
674  
675  
676  
677  
678  
679  
680  
681  
682  
683  
684  
685  
686  
687  
688  
689  
690  
691  
692  
693  
694  
695  
696  
697  
698  
699  
700  
701  
702  
703  
704  
705  
706  
707  
708  
709  
710  
711  
712  
713  
714  
715  
716  
717  
718  
719  
720  
721  
722  
723  
724  
725  
726  
727  
728  
729  
730  
731  
732  
733  
734  
735  
736  
737  
738  
739  
740  
741  
742  
743  
744  
745  
746  
747  
748  
749  
750  
751  
752  
753  
754  
755  
756  
757  
758  
759  
760  
761  
762  
763  
764  
765  
766  
767  
768  
769  
770  
771  
772  
773  
774  
775  
776  
777  
778  
779  
780  
781  
782  
783  
784  
785  
786  
787  
788  
789  
790  
791  
792  
793  
794  
795  
796  
797  
798  
799  
800  
801  
802  
803  
804  
805  
806  
807  
808  
809  
810  
811  
812  
813  
814  
815  
816  
817  
818  
819  
820  
821  
822  
823  
824  
825  
826  
827  
828  
829  
830  
831  
832  
833  
834  
835  
836  
837  
838  
839  
840  
841  
842  
843  
844  
845  
846  
847  
848  
849  
850  
851  
852  
853  
854  
855  
856  
857  
858  
859  
860  
861  
862  
863  
864  
865  
866  
867  
868  
869  
870  
871  
872  
873  
874  
875  
876  
877  
878  
879  
880  
881  
882  
883  
884  
885  
886  
887  
888  
889  
890  
891  
892  
893  
894  
895  
896  
897  
898  
899  
900  
901  
902  
903  
904  
905  
906  
907  
908  
909  
910  
911  
912  
913  
914  
915  
916  
917  
918  
919  
920  
921  
922  
923  
924  
925  
926  
927  
928  
929  
930  
931  
932  
933  
934  
935  
936  
937  
938  
939  
940  
941  
942  
943  
944  
945  
946  
947  
948  
949  
950  
951  
952  
953  
954  
955  
956  
957  
958  
959  
960  
961  
962  
963  
964  
965  
966  
967  
968  
969  
970  
971  
972  
973  
974  
975  
976  
977  
978  
979  
980  
981  
982  
983  
984  
985  
986  
987  
988  
989  
990  
991  
992  
993  
994  
995  
996  
997  
998  
999  
1000

Currently, 585 journals refer authors to the CONSORT statement[32]; nevertheless, there is an urgent need to improve abstracts. Findings from this study suggest that not all authors pay attention to the CONSORT statement as recommended by journals. The statement for abstracts and the corresponding checklist as well as the interactive

1  
2  
3 exploration platform provided in this context (CONSORT, 2019b; Hopewell et al.,  
4  
5 2008b) appear to be inadequate to ensure transparent and comprehensive reporting  
6  
7 even though they contain exact and detailed instructions for implementation as well as  
8  
9 specific examples. A particularly worrying fact is that this low rate of implementation  
10  
11 was also found for criteria that are easy to meet, such as the identification of a  
12  
13 publication as an RCT in the title, documentation of registration ID, or reporting the  
14  
15 number of participants included in the analysis. It seems reasonable to assume that  
16  
17 recommendations for the publication standard were not implemented because authors  
18  
19 would have to study additional literature for this purpose, and might not have the time  
20  
21 or patience to do so.  
22  
23  
24

25  
26 Many journals support the idea of explicitly requesting authors to use the CONSORT  
27  
28 checklist; CONSORT is endorsed by over 50% of the core medical journals listed in  
29  
30 the *Abridged Index Medicus* on PubMed as of April 2020[33]. A general request to  
31  
32 adhere to the CONSORT-A checklist in the drafting of publications and a demand for  
33  
34 obligatory implementation on the part of all journals may further improve reporting  
35  
36 quality in abstracts and thus promote comprehensive and transparent presentation.  
37  
38 Moreover, reviewers should check their data for completeness and correctness  
39  
40 according to CONSORT-A. Bearing in mind that publications are reviewed under  
41  
42 increasing time pressure, and primarily outside the job and on an honorary basis, the  
43  
44 entire review system might have to be reconsidered. One option would be to check  
45  
46 abstracts/publications for completeness of reporting as a preliminary step, followed by  
47  
48 the actual review procedure. By implementing this additional step, papers that are not  
49  
50 well structured and non-transparent may be identified early in the review process and  
51  
52 sent back for revision. Even if that means that additional human resources have to be  
53  
54 deployed, it seems to be an opportunity to focus the journals' review process on  
55  
56 content-related items.  
57  
58  
59  
60

## Conclusion

Even though the CONSORT group gave recommendations for the compilation of abstracts as early as 2008, the quality of such “miniature publications” remains suboptimal. Co-authors well versed in statistics should address and / or check methodological criteria, in particular when drafting abstracts and during the review process. Word count limitations seem to be another reason for the omission of important information. Abstracts play a key role for readers, and journals should not restrict the admissible number of words too rigidly.



1  
2  
3 **Authors' contributions:** Stephanie Knippschild wrote the initial draft of this  
4 manuscript and performed major parts of the statistical analysis. Jeremias  
5 Loddenkemper screened all abstracts of the literature search through PubMed and  
6 documented suitable publications for further processing. Moreover, he extracted the  
7 necessary information for evaluating the abstract quality and performed data entry and  
8 data validation. Sabrina Tulka conducted the regression analysis and revised the initial  
9 draft of this manuscript. Christine Loddenkemper validated the pool of studies by  
10 screening all abstracts and evaluating the studies included. Christine Baulig designed  
11 the review and its analysis concept; she implemented the literature search, including  
12 the identification of those RCTs to be included in the review and thoroughly revised the  
13 initial draft of this manuscript.  
14  
15  
16  
17  
18  
19  
20  
21  
22  
23  
24  
25  
26  
27  
28  
29  
30

## 31 **Acknowledgement**

32  
33  
34 The authors thank Christina Wagner for linguistic support in the preparation of this  
35 manuscript.  
36  
37  
38  
39

## 40 **Competing interests**

41  
42  
43 This study is part of the doctoral thesis written by Mr. Jeremias Loddenkemper in pursuit of a  
44 doctoral degree in dental medicine ("Dr. med. dent.") at Witten/Herdecke University.  
45  
46  
47

48 Furthermore, the results contained in this article have already been presented as part of a  
49 poster presentation at the 33rd DGI Congress, Hamburg (28-30 November 2019).  
50  
51

52 The authors declare that they have no competing financial, professional or personal interests  
53 that might have influenced the performance or presentation of the work described in this  
54 manuscript.  
55  
56  
57  
58  
59  
60

## **Non-financial competing interests**

### **Data sharing**

This manuscript contains data from an ongoing doctoral project. Therefore data cannot be made available until completion.

### **Ethics Statement**

This study constitutes an analysis of published abstracts on RCTs and therefore does not require approval by an ethics committee.

For peer review only

## Reference list

1. EQUATOR-Network. EQUATOR-Network: Minervation Ltd; [Available from: <https://www.equator-network.org/reporting-guidelines/>].
2. CONSORT. Extensions of the CONSORT Statement 2019 [Available from: <http://www.consort-statement.org/extensions>].
3. Barry HC, Ebell MH, Shaughnessy AF, et al. Family physicians' use of medical abstracts to guide decision making: style or substance? *J Am Board Fam Pract* 2001;14:437-42.
4. Sivendran S, Newport K, Horst M, et al. Reporting quality of abstracts in phase III clinical trials of systemic therapy in metastatic solid malignancies. *Trials* 2015;16:341.
5. Barbour V, Chinnock P, Cohen B, et al. The impact of open access upon public health. *Bull World Health Organ* 2006;84:339.
6. Lund H, Juhl CB, Norgaard B, et al. Evidence-Based Research Series-Paper 2 : Using an Evidence-Based Research approach before a new study is conducted to ensure value. *Journal of clinical epidemiology* 2021;129:158-66.
7. Alharbi F, Almuzian M. The quality of reporting RCT abstracts in four major orthodontics journals for the period 2012-2017. *J Orthod* 2019;46:225-34.
8. Baulig C, Krummenauer F, Geis B, et al. Reporting quality of randomised controlled trial abstracts on age-related macular degeneration health care: a cross-sectional quantification of the adherence to CONSORT abstract reporting recommendations. *BMJ Open* 2018;8:e021912.
9. Khan MS, Shaikh A, Ochani RK, et al. Assessing the Quality of Abstracts in Randomized Controlled Trials Published in High Impact Cardiovascular Journals. *Circ Cardiovasc Qual Outcomes* 2019;12:e005260.
10. Kuriyama A, Takahashi N, Nakayama T. Reporting of critical care trial abstracts: a comparison before and after the announcement of CONSORT guideline for abstracts. *Trials* 2017;18:32.
11. Kiriakou J, Pandis N, Madianos P, et al. Assessing the reporting quality in abstracts of randomized controlled trials in leading journals of oral implantology. *The journal of evidence-based dental practice* 2014;14:9-15.
12. Hopewell S, Clarke M, Moher D, et al. CONSORT for reporting randomised trials in journal and conference abstracts. *Lancet* 2008;371:281-3.
13. Hopewell S, Clarke M, Moher D, et al. CONSORT for reporting randomized controlled trials in journal and conference abstracts: explanation and elaboration. *PLoS medicine* 2008;5:e20.
14. Excel®. Microsoft® Excel® 2010. Redmond WA USA Microsoft Corporation. ; 2010.
15. Released IC. IBM SPSS Statistics for Windows. Version 26.0 ed. NY: IBM Corp 2020.
16. De Angelis N, Nevins ML, Camelo MC, et al. Platform switching versus conventional technique: a randomized controlled clinical trial. *The International journal of periodontics & restorative dentistry* 2014;34 Suppl 3:s75-9.
17. Pistilli R, Felice P, Piatelli M, et al. Blocks of autogenous bone versus xenografts for the rehabilitation of atrophic jaws with dental implants: preliminary data from a pilot randomised controlled trial. *European journal of oral implantology* 2014;7:153-71.
18. Gocmen G, Atali O, Aktop S, et al. Hyaluronic Acid Versus Ultrasonic Resorbable Pin Fixation for Space Maintenance in Non-Grafted Sinus Lifting. *Journal of oral and maxillofacial surgery : official journal of the American Association of Oral and Maxillofacial Surgeons* 2016;74:497-504.
19. Kasperski J, Rosak P, Roj R, et al. The influence of low-frequency variable magnetic fields in reducing pain experience after dental implant treatment. *Acta Bioeng Biomech* 2015;17:97-105.
20. Torroella-Saura G, Mareque-Bueno J, Cabratosa-Termes J, et al. Effect of implant design in immediate loading. A randomized, controlled, split-mouth, prospective clinical trial. *Clinical oral implants research* 2015;26:240-4.
21. Arduino PG, Tirone F, Schiorlin E, et al. Single preoperative dose of prophylactic amoxicillin versus a 2-day postoperative course in dental implant surgery: A two-centre randomised controlled trial. *European journal of oral implantology* 2015;8:143-9.

- 1  
2  
3 22. Arbab H, Greenwell H, Hill M, et al. Ridge Preservation Comparing a Nonresorbable PTFE  
4 Membrane to a Resorbable Collagen Membrane: A Clinical and Histologic Study in Humans. *Implant*  
5 *dentistry* 2016;25:128-34.
- 6 23. Xie L, Qin W, Gu Y, et al. Quality assessment of randomized controlled trial abstracts on drug  
7 therapy of periodontal disease from the abstracts published in dental Science Citation Indexed journals  
8 in the last ten years. *Medicina oral, patologia oral y cirugia bucal* 2020;25:e626-e33.
- 9 24. Berwanger O, Ribeiro RA, Finkelsztein A, et al. The quality of reporting of trial abstracts is  
10 suboptimal: survey of major general medical journals. *Journal of clinical epidemiology* 2009;62:387-92.
- 11 25. Gallo L, Wakeham S, Dunn E, et al. The Reporting Quality of Randomized Controlled Trial  
12 Abstracts in Plastic Surgery. *Aesthet Surg J* 2020;40:335-41.
- 13 26. Chow JTY, Turkstra TP, Yim E, et al. The degree of adherence to CONSORT reporting guidelines  
14 for the abstracts of randomised clinical trials published in anaesthesia journals: A cross-sectional study  
15 of reporting adherence in 2010 and 2016. *Eur J Anaesthesiol* 2018:942-8.
- 16 27. Speich B, Mc Cord KA, Agarwal A, et al. Reporting Quality of Journal Abstracts for Surgical  
17 Randomized Controlled Trials Before and After the Implementation of the CONSORT Extension for  
18 Abstracts. *World J Surg* 2019:2371-8.
- 19 28. Ghimire S, Kyung E, Kang W, et al. Assessment of adherence to the CONSORT statement for  
20 quality of reports on randomized controlled trial abstracts from four high-impact general medical  
21 journals. *Trials* 2012;13:77.
- 22 29. Fleming PS, Buckley N, Seehra J, et al. Reporting quality of abstracts of randomized controlled  
23 trials published in leading orthodontic journals from 2006 to 2011. *Am J Orthod Dentofacial Orthop*  
24 2012;142:451-8.
- 25 30. Seehra J, Wright NS, Polychronopoulou A, et al. Reporting quality of abstracts of randomized  
26 controlled trials published in dental specialty journals. *The journal of evidence-based dental practice*  
27 2013;13:1-8.
- 28 31. Faggion CM, Jr., Giannakopoulos NN. Quality of reporting in abstracts of randomized controlled  
29 trials published in leading journals of periodontology and implant dentistry: a survey. *Journal of*  
30 *periodontology* 2012;83:1251-6.
- 31 32. CONSORT. Endorsers - Journals and Organizations: CONSORT; 2019 [Available from:  
32 <http://www.consort-statement.org/about-consort/endorsers1>.
- 33 33. Group TC. Endorsers-Journals and Organizations 2020 [Available from: [http://www.consort-](http://www.consort-statement.org/about-consort/endorsers1)  
34 [statement.org/about-consort/endorsers1](http://www.consort-statement.org/about-consort/endorsers1).  
35  
36  
37  
38  
39  
40  
41  
42  
43  
44  
45  
46  
47  
48  
49  
50  
51  
52  
53  
54  
55  
56  
57  
58  
59  
60

1  
2  
3 **Fig. 1:** Description of the selection procedure and documentation of the number of  
4 published RCTs from dental implantology, the aim being a data pool to identify – per  
5 criterion and study – the degree of adherence to the CONSORT recommendations for  
6 abstracts. Fifty study reports had to be excluded from further investigation and analysis  
7 because the clinical indication (N=1) or the study design (N=39) were not compatible  
8 or the respective data sets referred to investigations of animals (N=7), were reviews  
9 (N=1) or were not identifiable as RCTs (N=2).  
10  
11  
12  
13  
14  
15  
16  
17  
18  
19  
20

21 **Fig. 2:** Illustration of the degree of adherence per study (%) in a box plot (N=212).  
22 Degree of adherence I (quantitative implementation), degree of adherence II  
23 (qualitative implementation).  
24  
25  
26  
27  
28  
29  
30

31 **Fig. 3:** Graphical representation of proportional implementation of criteria to facilitate  
32 locating the corresponding information in the abstract (degree of adherence I vs.  
33 degree of adherence II).  
34  
35  
36  
37  
38  
39

40 **Supplementary Fig. 1:** Graphical representation of proportional implementation of  
41 criteria to facilitate locating the corresponding information in the abstract (degree of  
42 adherence I).  
43  
44  
45  
46  
47  
48

49 **Supplementary Fig. 2:** Illustration of the degree of adherence per study (%) in a box  
50 plot (N=212). Degree of adherence I (quantitative implementation), degree of  
51 adherence II (qualitative implementation). Evaluation of the reduced data pool with  
52 14 criteria (excluded: “registration” and “funding”).  
53  
54  
55  
56  
57  
58  
59  
60

1  
2  
3 **Supplementary Fig. 3:** Illustration of the degree of adherence per study (%) in a box  
4 plot (N=212) as a comparison of data pools with 14 vs. 16 criteria. Degree of  
5 adherence I (quantitative implementation), degree of adherence II (qualitative  
6 implementation). Evaluation of the reduced data pool was based on 14 criteria  
7 (excluded: “registration” and “funding”).  
8  
9  
10  
11  
12  
13  
14  
15  
16  
17  
18  
19  
20  
21  
22  
23  
24  
25  
26  
27  
28  
29  
30  
31  
32  
33  
34  
35  
36  
37  
38  
39  
40  
41  
42  
43  
44  
45  
46  
47  
48  
49  
50  
51  
52  
53  
54  
55  
56  
57  
58  
59  
60

For peer review only



Description of the selection procedure and documentation of the number of published RCTs from dental implantology, the aim being a data pool to identify – per criterion and study – the degree of adherence to the CONSORT recommendations for abstracts. 50 study reports had to be excluded from further investigation and analysis because the field of indication (N=1) or the study design (N=39) were not compatible, or the respective datasets referred to investigations of animals (N=7), were reviews (N=1) or not identifiable as RCTs (N=2).

283x182mm (150 x 150 DPI)

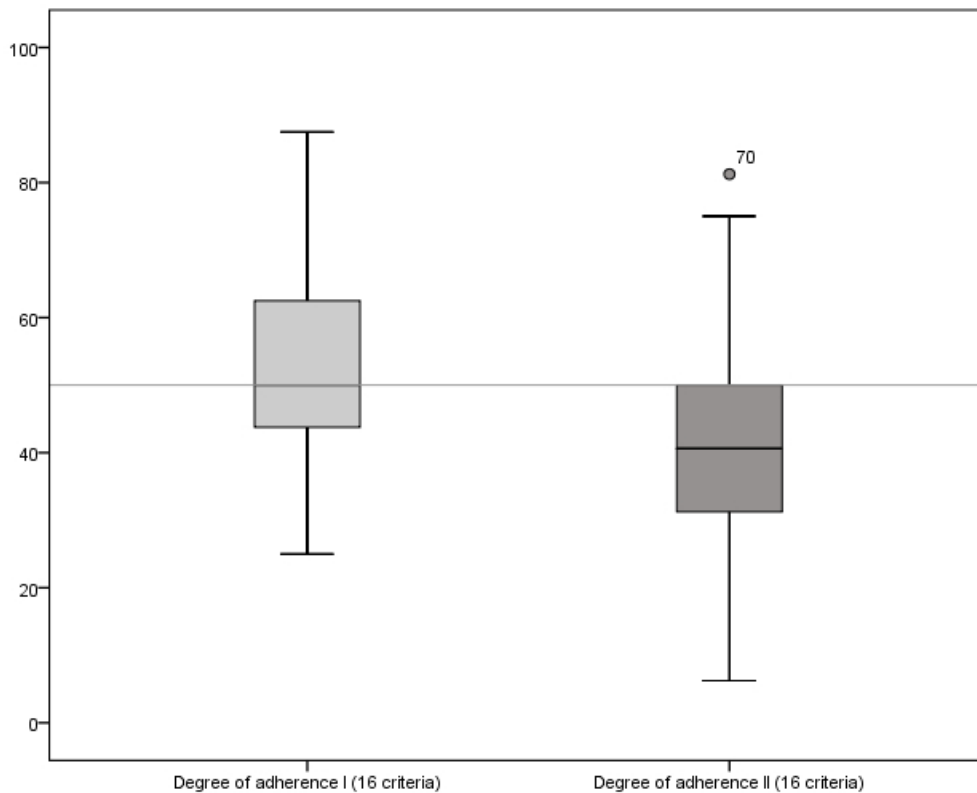

Illustration of degree of adherence per study (%) via box plot (N=212). Degree of adherence I (quantitative implementation), degree of adherence II (qualitative implementation).

220x176mm (72 x 72 DPI)



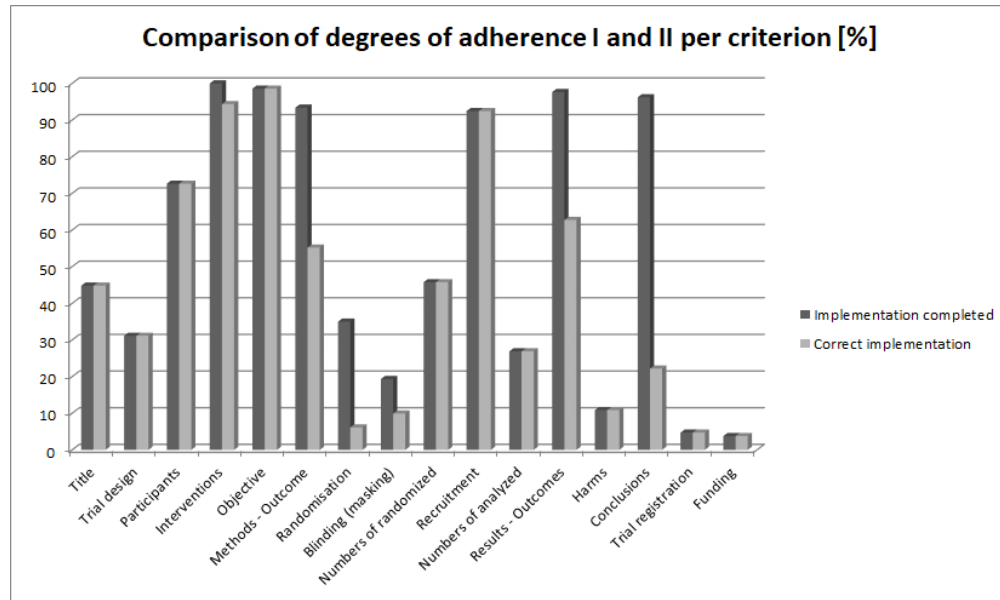

Graphic display of proportional implementation of criteria to facilitate the location of pertinent information in the abstract (degree of adherence I vs. degree of adherence II).

69x41mm (300 x 300 DPI)

| CONSORT criterion                                        | Degree of adherence I                                                                                                    | Degree of adherence II                                                                                                       |
|----------------------------------------------------------|--------------------------------------------------------------------------------------------------------------------------|------------------------------------------------------------------------------------------------------------------------------|
| <b>Identification as a randomised trial in the title</b> | Does the title contain “randomised controlled trial” or RCT?                                                             | *                                                                                                                            |
| <b>Trial design</b>                                      | Description of design in addition to: RCT (randomised, controlled) and Multicentre...                                    | *                                                                                                                            |
| <b>Participant characteristics</b>                       | To document patient characteristics in the abstract, it is not enough to say that patients are suitable for the therapy. | *                                                                                                                            |
| <b>Interventions</b>                                     | Intervention indicated                                                                                                   | Intervention for each group including dosis indicated                                                                        |
| <b>Objective</b>                                         | Specific objective or hypothesis                                                                                         | *                                                                                                                            |
| <b>Definition primary endpoint</b>                       | Documentation of (multiple) endpoints                                                                                    | Clearly defined primary endpoint including measurement variables                                                             |
| <b>Randomisation</b>                                     | Documentation of randomisation ratio in the section Material and Methods                                                 | Description of method used to generate the random allocation sequence and implementation in the section Material and Methods |
| <b>Blinding</b>                                          | Documentation of “blinded” procedure using “masked”, “blinded”, “doubleblind” or similar descriptions                    | Exact indication of which patient group was blinded                                                                          |
| <b>Numbers randomised</b>                                | Number of patients randomised to each group must be given, or at least total number with randomisation ratio!            | *                                                                                                                            |
| <b>Recruitment</b>                                       | Dates defining the trial period (trial completed/interim report/trial from ... to ...).                                  | *                                                                                                                            |
| <b>Numbers analysed</b>                                  | Number of participants analysed in EACH group                                                                            | *                                                                                                                            |
| <b>Results of outcome</b>                                | Results reported in section “Results”                                                                                    | Results were reported with reference to the primary endpoint. Effect size and precision are reported for each group.         |
| <b>Harms</b>                                             | General description                                                                                                      | *                                                                                                                            |
| <b>Conclusion</b>                                        | The abstract contains a conclusion or summary.                                                                           | The conclusion refers to the research question/results and lists benefits and limitations of the study                       |
| <b>Trial registration</b>                                | Registration number                                                                                                      | *                                                                                                                            |
| <b>Funding</b>                                           | Source of funding                                                                                                        | *                                                                                                                            |

Supplementary table 1: Evaluation basis for CONSORT-A criteria referring to degree of adherence I (information given in the abstract) and degree of adherence II (correct documentation in accordance

1  
2  
3  
4  
5  
6  
7  
8  
9  
10  
11  
12  
13  
14  
15  
16  
17  
18  
19  
20  
21  
22  
23  
24  
25  
26  
27  
28  
29  
30  
31  
32  
33  
34  
35  
36  
37  
38  
39  
40  
41  
42  
43  
44  
45  
46  
47  
48  
49  
50  
51  
52  
53  
54  
55  
56  
57  
58  
59  
60

with CONSORT-A). \* Variables without formal degree of adherence II. Values from degree of adherence  
I are transferred.

For peer review only

| Search | MESH Therms                                                                                                                                                                                               | No. of studies |
|--------|-----------------------------------------------------------------------------------------------------------------------------------------------------------------------------------------------------------|----------------|
| #8     | Search (((("randomized controlled trial"[Publication Type]) AND ("2014"[Date - Publication] : "2016"[Date - Publication])) AND human) AND (((dental implantation) OR dental implant) OR tooth artificial) | 262            |
| #7     | ((dental implantation) OR dental implant) OR tooth artificial                                                                                                                                             | 46684          |
| #6     | Search dental implantation                                                                                                                                                                                | 21511          |
| #4     | Search human                                                                                                                                                                                              | 16842581       |
| #2     | Search ("2014"[Date - Publication] : "2016"[Date - Publication])                                                                                                                                          | 3387284        |
| #1     | Search "randomized controlled trial"[Publication Type]                                                                                                                                                    | 429525         |

Supplementary table 2: Result from literature research in the electronic database PubMed on March 7, 2017

| <b>Journal</b><br><i>[journal title abbreviation]</i> | <b>Number</b><br><i>[N]</i> | <b>Proportion</b><br><i>(%)</i> | <b>5-year IF</b><br><i>[as per 2018]</i> | <b>Word count limits</b><br><i>[words]</i> |
|-------------------------------------------------------|-----------------------------|---------------------------------|------------------------------------------|--------------------------------------------|
| Acta Bioeng Biomech                                   | 1                           | 0,5                             | 1,112                                    | 150-250                                    |
| Acta Odontol Scand                                    | 3                           | 1,4                             | 1,565                                    | 250                                        |
| Am J Dent                                             | 1                           | 0,5                             | 0,720                                    | No limit                                   |
| Am J Orthod Dentofacial Orthop                        | 2                           | 0,9                             | 1,911                                    | 250                                        |
| Angle Orthod                                          | 1                           | 0,5                             | 1,880                                    | 250                                        |
| Ann Anat                                              | 2                           | 0,9                             | 2,241                                    | No limit                                   |
| Biomed Res Int                                        | 3                           | 1,4                             | 2,197                                    | 300                                        |
| Br J Oral Maxillofac Surg                             | 2                           | 0,9                             | 1,164                                    | 250                                        |
| Clin Implant Dent Relat Res                           | 22                          | 10,4                            | 3,212                                    | 150-200                                    |
| Clin Oral Implants Res                                | 36                          | 17,0                            | 3,825                                    | 250                                        |
| Compend Contin Educ Dent                              | 1                           | 0,5                             | 0                                        | n.a.                                       |
| Curr Med Res Opin                                     | 1                           | 0,5                             | 2,345                                    | 250                                        |
| Eur J Oral Implantol                                  | 36                          | 17,0                            | 2,513                                    | 250                                        |
| Eur J Orthod                                          | 1                           | 0,5                             | 1,841                                    | 330                                        |
| Hua Xi Kou Qiang Yi Xue Za Zhi                        | 2                           | 0,9                             | 0                                        | No limit                                   |
| Int J Oral Maxillofac Surg                            | 7                           | 3,3                             | 1,961                                    | 300                                        |
| Int J Oral Maxillofac Implants                        | 23                          | 10,8                            | 1,734                                    | 350                                        |
| Int J Periodontics Restorative Dent                   | 7                           | 3,3                             | 1,228                                    | 75-100                                     |
| Int J Prosthodont                                     | 7                           | 3,3                             | 1,533                                    | 350                                        |
| Implant Dent                                          | 5                           | 2,4                             | 1,214                                    | 225                                        |
| J Biomater Appl                                       | 1                           | 0,5                             | 2,442                                    | No limit                                   |
| J Bone Miner Res                                      | 1                           | 0,5                             | 5,711                                    | 300                                        |
| J Clin Periodontol                                    | 9                           | 4,2                             | 4,164                                    | 200                                        |
| J Craniofac Surg                                      | 1                           | 0,5                             | 0,785                                    | 200                                        |
| J Dent                                                | 1                           | 0,5                             | 3,280                                    | 250                                        |
| J Dent Res                                            | 4                           | 1,9                             | 5,125                                    | 300                                        |
| J Oral Implantol                                      | 3                           | 1,4                             | 5,125                                    | 250                                        |
| J Oral Maxillofac Surg                                | 1                           | 0,5                             | 1,781                                    | 300                                        |
| J Oral Rehabil                                        | 3                           | 1,4                             | 2,341                                    | 250                                        |
| J Periodontol                                         | 4                           | 1,9                             | 2,768                                    | 250                                        |
| J Periodontal Res                                     | 1                           | 0,5                             | 2,613                                    | 250                                        |
| J Plast Reconstr Aesthet Surg                         | 1                           | 0,5                             | 2,228                                    | 250                                        |
| J Prosthodont                                         | 2                           | 0,9                             | 2,636                                    | 350                                        |
| Med Oral Patol Oral Cir Bucal                         | 3                           | 1,4                             | 1,284                                    | 150-300                                    |
| Oral Maxillofac Surg                                  | 1                           | 0,5                             | 1,781                                    | 300                                        |
| Oxid Med Cell Longev                                  | 1                           | 0,5                             | 4,868                                    | 200                                        |
| Prog Orthod                                           | 1                           | 0,5                             | 1,381                                    | 350                                        |
| Quintessence Int                                      | 1                           | 0,5                             | 1,392                                    | 250                                        |
| Saudi Med J                                           | 2                           | 0,9                             | 1,055                                    | 230                                        |
| Sci Rep                                               | 1                           | 0,5                             | 4,011                                    | 200                                        |
| Stomatologiia                                         | 1                           | 0,5                             | 0                                        | 250                                        |
| Swed Dent J                                           | 1                           | 0,5                             | 0,818                                    | 300                                        |

|                          |            |              |       |         |
|--------------------------|------------|--------------|-------|---------|
| Trials                   | 3          | 1,4          | 1,975 | 350     |
| Vestn Ross Akad Med Nauk | 1          | 0,5          | 0     | 300-500 |
| Vojnosanit Pregl         | 1          | 0,5          | 0,272 | 450     |
| <b>Total</b>             | <b>212</b> | <b>100,0</b> |       |         |

Supplementary table 3: List of journals [N] (%) from which information was extracted for final analysis, 5-year Impact Factor [2018] and word count limits for each journal as per 2019

For peer review only

| Criterion                 | Percentage match | Kappa | <b>*Kappa 0.61 – 1.0</b><br>(essential match and almost perfect match) |
|---------------------------|------------------|-------|------------------------------------------------------------------------|
| <b>Title</b>              | 83%              | 0,677 | *                                                                      |
| <b>Trial design</b>       | 89%              | 0,738 | *                                                                      |
| <b>Participants</b>       | 90%              | 0,744 | *                                                                      |
| <b>Interventions</b>      | 100%             | n.a.  |                                                                        |
| <b>Objective</b>          | 100%             | 0,798 | *                                                                      |
| <b>Outcome</b>            | 91%              | 0,312 |                                                                        |
| <b>Randomisation</b>      | 82%              | 0,318 |                                                                        |
| <b>Blinding (masking)</b> | 92%              | 0,726 | *                                                                      |
| <b>Numbers randomised</b> | 76%              | 0,515 |                                                                        |
| <b>Recruitment</b>        | 85%              | 0,310 |                                                                        |
| <b>Numbers analysed</b>   | 84%              | 0,606 |                                                                        |
| <b>Outcome</b>            | 100%             | 1,000 | *                                                                      |
| <b>Harms</b>              | 62%              | 0,041 |                                                                        |
| <b>Conclusions</b>        | 100%             | 1,000 | *                                                                      |
| <b>Trial registration</b> | 97%              | 0,449 |                                                                        |
| <b>Funding</b>            | 99%              | 0,762 | *                                                                      |

Supplementary table 4: Calculation of Kappa for inter-rater reliability; percentage match between evaluators; Kappa, n.a.= in this case calculation of Kappa was not performed (SPSS) since one evaluator had rated the criterion "intervention" as 1 for all publications; (\*) for criteria which showed an essential match or an almost perfect match between evaluators.

# Degree of adherence per criterion - degree of adherence I [%]

BMJ Open

Page 38 of 42

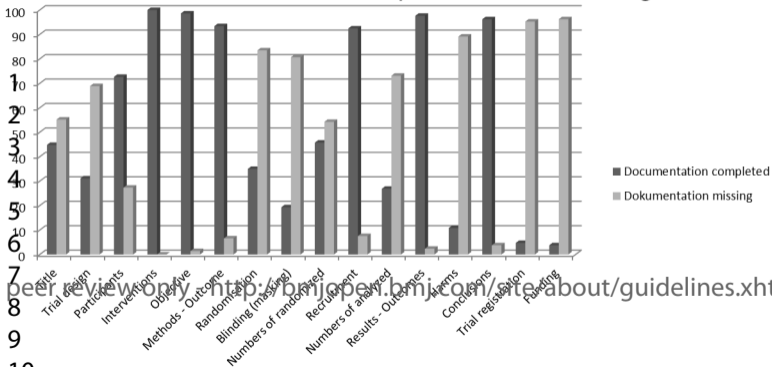





For peer review only - <http://bmjopen.bmj.com/site/about/guidelines.xhtml>

Degree of adherence I (14 criteria)

Degree of adherence II (14 criteria)

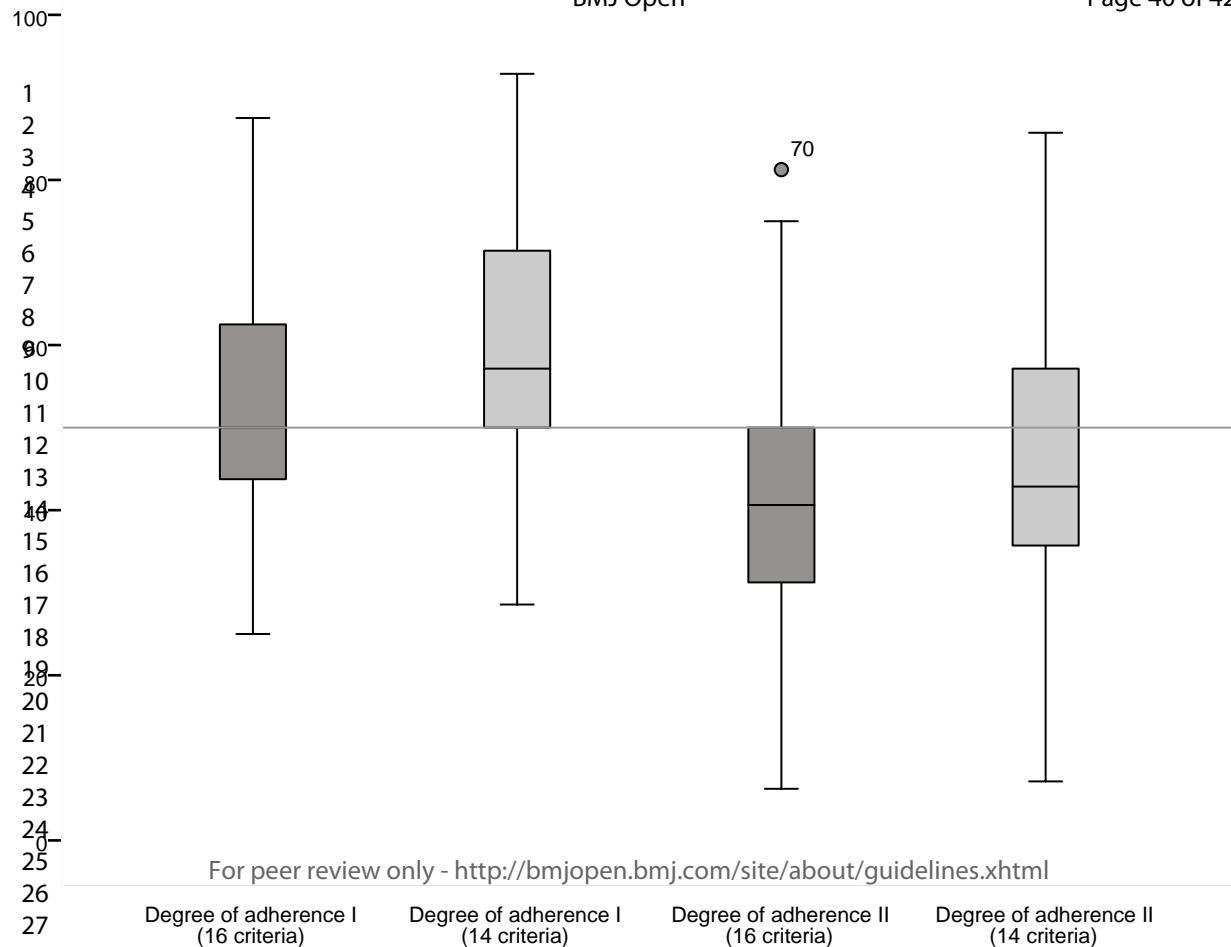



# PRISMA 2009 Checklist

1  
2  
3  
4  
5  
6  
7  
8  
9  
10  
11  
12  
13  
14  
15  
16  
17  
18  
19  
20  
21  
22  
23  
24  
25  
26  
27  
28  
29  
30  
31  
32  
33  
34  
35  
36  
37  
38  
39  
40  
41  
42  
43  
44  
45  
46  
47

| Section/topic                      | #  | Checklist item                                                                                                                                                                                                                                                                                              | Reported on page #                 |
|------------------------------------|----|-------------------------------------------------------------------------------------------------------------------------------------------------------------------------------------------------------------------------------------------------------------------------------------------------------------|------------------------------------|
| <b>TITLE</b>                       |    |                                                                                                                                                                                                                                                                                                             |                                    |
| Title                              | 1  | Identify the report as a systematic review, meta-analysis, or both.                                                                                                                                                                                                                                         | 1                                  |
| <b>ABSTRACT</b>                    |    |                                                                                                                                                                                                                                                                                                             |                                    |
| Structured summary                 | 2  | Provide a structured summary including, as applicable: background; objectives; data sources; study eligibility criteria, participants, and interventions; study appraisal and synthesis methods; results; limitations; conclusions and implications of key findings; systematic review registration number. | II                                 |
| <b>INTRODUCTION</b>                |    |                                                                                                                                                                                                                                                                                                             |                                    |
| Rationale                          | 3  | Describe the rationale for the review in the context of what is already known.                                                                                                                                                                                                                              | 1-3                                |
| Objectives                         | 4  | Provide an explicit statement of questions being addressed with reference to participants, interventions, comparisons, outcomes, and study design (PICOS).                                                                                                                                                  | 3                                  |
| <b>METHODS</b>                     |    |                                                                                                                                                                                                                                                                                                             |                                    |
| Protocol and registration          | 5  | Indicate if a review protocol exists, if and where it can be accessed (e.g., Web address), and, if available, provide registration information including registration number.                                                                                                                               | n.a.                               |
| Eligibility criteria               | 6  | Specify study characteristics (e.g., PICOS, length of follow-up) and report characteristics (e.g., years considered, language, publication status) used as criteria for eligibility, giving rationale.                                                                                                      | 4-5                                |
| Information sources                | 7  | Describe all information sources (e.g., databases with dates of coverage, contact with study authors to identify additional studies) in the search and date last searched.                                                                                                                                  | 4                                  |
| Search                             | 8  | Present full electronic search strategy for at least one database, including any limits used, such that it could be repeated.                                                                                                                                                                               | Supplementary table 2              |
| Study selection                    | 9  | State the process for selecting studies (i.e., screening, eligibility, included in systematic review, and, if applicable, included in the meta-analysis).                                                                                                                                                   | 4<br>Figure 1                      |
| Data collection process            | 10 | Describe method of data extraction from reports (e.g., piloted forms, independently, in duplicate) and any processes for obtaining and confirming data from investigators.                                                                                                                                  | 4                                  |
| Data items                         | 11 | List and define all variables for which data were sought (e.g., PICOS, funding sources) and any assumptions and simplifications made.                                                                                                                                                                       | 3-4                                |
| Risk of bias in individual studies | 12 | Describe methods used for assessing risk of bias of individual studies (including specification of whether this was done at the study or outcome level), and how this information is to be used in any data synthesis.                                                                                      | n.a. -><br>Assessment of Abstracts |
| Summary measures                   | 13 | State the principal summary measures (e.g., risk ratio, difference in means).                                                                                                                                                                                                                               | 4-5                                |

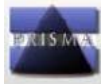

# PRISMA 2009 Checklist

|                      |    |                                                                                                                                                           |      |
|----------------------|----|-----------------------------------------------------------------------------------------------------------------------------------------------------------|------|
| Synthesis of results | 14 | Describe the methods of handling data and combining results of studies, if done, including measures of consistency (e.g., $I^2$ ) for each meta-analysis. | n.a. |
|----------------------|----|-----------------------------------------------------------------------------------------------------------------------------------------------------------|------|

Page 1 of 2

| Section/topic                 | #  | Checklist item                                                                                                                                                                                           | Reported on page #              |
|-------------------------------|----|----------------------------------------------------------------------------------------------------------------------------------------------------------------------------------------------------------|---------------------------------|
| Risk of bias across studies   | 15 | Specify any assessment of risk of bias that may affect the cumulative evidence (e.g., publication bias, selective reporting within studies).                                                             | n.a. -> Assessment of Abstracts |
| Additional analyses           | 16 | Describe methods of additional analyses (e.g., sensitivity or subgroup analyses, meta-regression), if done, indicating which were pre-specified.                                                         | 5                               |
| <b>RESULTS</b>                |    |                                                                                                                                                                                                          |                                 |
| Study selection               | 17 | Give numbers of studies screened, assessed for eligibility, and included in the review, with reasons for exclusions at each stage, ideally with a flow diagram.                                          | Table 1                         |
| Study characteristics         | 18 | For each study, present characteristics for which data were extracted (e.g., study size, PICOS, follow-up period) and provide the citations.                                                             | 5-6                             |
| Risk of bias within studies   | 19 | Present data on risk of bias of each study and, if available, any outcome level assessment (see item 12).                                                                                                | n.a. -> Assessment of Abstracts |
| Results of individual studies | 20 | For all outcomes considered (benefits or harms), present, for each study: (a) simple summary data for each intervention group (b) effect estimates and confidence intervals, ideally with a forest plot. | n.a. -> Assessment of Abstracts |
| Synthesis of results          | 21 | Present results of each meta-analysis done, including confidence intervals and measures of consistency.                                                                                                  | n.a. -> Assessment of Abstracts |
| Risk of bias across studies   | 22 | Present results of any assessment of risk of bias across studies (see Item 15).                                                                                                                          | n.a. -> Assessment of Abstracts |
| Additional analysis           | 23 | Give results of additional analyses, if done (e.g., sensitivity or subgroup analyses, meta-regression [see Item 16]).                                                                                    | 8-9                             |
| <b>DISCUSSION</b>             |    |                                                                                                                                                                                                          |                                 |
| Summary of evidence           | 24 | Summarize the main findings including the strength of evidence for each main outcome; consider their relevance to key groups (e.g., healthcare providers, users, and policy makers).                     | 12-14                           |
| Limitations                   | 25 | Discuss limitations at study and outcome level (e.g., risk of bias), and at review-level (e.g., incomplete retrieval of identified research, reporting bias).                                            | 11-12                           |
| Conclusions                   | 26 | Provide a general interpretation of the results in the context of other evidence, and implications for future research.                                                                                  | 15                              |

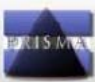

# PRISMA 2009 Checklist

1  
2  
3  
4  
5  
6  
7  
8  
9  
10  
11  
12  
13  
14  
15  
16  
17  
18  
19  
20  
21  
22  
23  
24  
25  
26  
27  
28  
29  
30  
31  
32  
33  
34  
35  
36  
37  
38  
39  
40  
41  
42  
43  
44  
45  
46  
47

|                |    |                                                                                                                                            |           |
|----------------|----|--------------------------------------------------------------------------------------------------------------------------------------------|-----------|
| <b>FUNDING</b> |    |                                                                                                                                            |           |
| Funding        | 27 | Describe sources of funding for the systematic review and other support (e.g., supply of data); role of funders for the systematic review. | III<br>11 |

From: Moher D, Liberati A, Tetzlaff J, Altman DG, The PRISMA Group (2009). Preferred Reporting Items for Systematic Reviews and Meta-Analyses: The PRISMA Statement. PLoS Med 6(7): e1000097. doi:10.1371/journal.pmed1000097

For more information, visit: [www.prisma-statement.org](http://www.prisma-statement.org).

For peer review only
