# Supplementary material for: Assessment of reporting quality in randomised controlled clinical trial abstracts of dental implantology published from 2014 to 2016
Source: PubMed Central journal article supplement — BMJ Open. 2021 Aug 13;11(8):e045372. doi: 10.1136/bmjopen-2020-045372 (PMC8365792; doi:10.1136/bmjopen-2020-045372), 2021-08-13
Supplement: bmjopen-2020-045372supp001.pdf [file bmjopen-2020-045372supp001.pdf]

| CONSORT criterion                                        | Degree of adherence I                                                                                                    | Degree of adherence II                                                                                                       |
|----------------------------------------------------------|--------------------------------------------------------------------------------------------------------------------------|------------------------------------------------------------------------------------------------------------------------------|
| <b>Identification as a randomised trial in the title</b> | Does the title contain "randomised controlled trial" or RCT?                                                             | *                                                                                                                            |
| <b>Trial design</b>                                      | Description of design in addition to: RCT (randomised, controlled) and Multicentre...                                    | *                                                                                                                            |
| <b>Participant characteristics</b>                       | To document patient characteristics in the abstract, it is not enough to say that patients are suitable for the therapy. | *                                                                                                                            |
| <b>Interventions</b>                                     | Intervention indicated                                                                                                   | Intervention for each group including dosis indicated                                                                        |
| <b>Objective</b>                                         | Specific objective or hypothesis                                                                                         | *                                                                                                                            |
| <b>Definition primary endpoint</b>                       | Documentation of (multiple) endpoints                                                                                    | Clearly defined primary endpoint including measurement variables                                                             |
| <b>Randomisation</b>                                     | Documentation of randomisation ratio in the section Material and Methods                                                 | Description of method used to generate the random allocation sequence and implementation in the section Material and Methods |
| <b>Blinding</b>                                          | Documentation of "blinded" procedure using "masked", "blinded", "doubleblind" or similar descriptions                    | Exact indication of which patient group was blinded                                                                          |
| <b>Numbers randomised</b>                                | Number of patients randomised to each group must be given, or at least total number with randomisation ratio!            | *                                                                                                                            |
| <b>Recruitment</b>                                       | Dates defining the trial period (trial completed/interim report/trial from ... to ...) .                                 | *                                                                                                                            |
| <b>Numbers analysed</b>                                  | Number of participants analysed in EACH group                                                                            | *                                                                                                                            |
| <b>Results of outcome</b>                                | Results reported in section "Results"                                                                                    | Results were reported with reference to the primary endpoint. Effect size and precision are reported for each group.         |
| <b>Harms</b>                                             | General description                                                                                                      | *                                                                                                                            |
| <b>Conclusion</b>                                        | The abstract contains a conclusion or summary.                                                                           | The conclusion refers to the research question/results and lists benefits and limitations of the study                       |
| <b>Trial registration</b>                                | Registration number                                                                                                      | *                                                                                                                            |
| <b>Funding</b>                                           | Source of funding                                                                                                        | *                                                                                                                            |

Supplementary table 1: Evaluation basis for CONSORT-A criteria referring to degree of adherence I (information given in the abstract) and degree of adherence II (correct documentation in accordance

with CONSORT-A). \* Variables without formal degree of adherence II. Values from degree of adherence I are transferred.
