# Supplementary material for: Assessment of reporting quality in randomised controlled clinical trial abstracts of dental implantology published from 2014 to 2016
Source: PubMed Central journal article supplement — BMJ Open. 2021 Aug 13;11(8):e045372. doi: 10.1136/bmjopen-2020-045372 (PMC8365792; doi:10.1136/bmjopen-2020-045372), 2021-08-13
Supplement: bmjopen-2020-045372supp002.pdf [file bmjopen-2020-045372supp002.pdf]

| Search | MesH Therms                                                                                                                                                                                               | No. of studies |
|--------|-----------------------------------------------------------------------------------------------------------------------------------------------------------------------------------------------------------|----------------|
| #8     | Search (((("randomized controlled trial"[Publication Type]) AND ("2014"[Date - Publication] : "2016"[Date - Publication])) AND human) AND (((dental implantation) OR dental implant) OR tooth artificial) | 262            |
| #7     | ((dental implantation) OR dental implant) OR tooth artificial                                                                                                                                             | 46684          |
| #6     | Search dental implantation                                                                                                                                                                                | 21511          |
| #4     | Search human                                                                                                                                                                                              | 16842581       |
| #2     | Search ("2014"[Date - Publication] : "2016"[Date - Publication])                                                                                                                                          | 3387284        |
| #1     | Search "randomized controlled trial"[Publication Type]                                                                                                                                                    | 429525         |

Supplementary table 2: Result from literature research in the electronic database PubMed on March 7, 2017
