# Supplementary material for: Assessment of reporting quality in randomised controlled clinical trial abstracts of dental implantology published from 2014 to 2016
Source: PubMed Central journal article supplement — BMJ Open. 2021 Aug 13;11(8):e045372. doi: 10.1136/bmjopen-2020-045372 (PMC8365792; doi:10.1136/bmjopen-2020-045372), 2021-08-13
Supplement: bmjopen-2020-045372supp003.pdf [file bmjopen-2020-045372supp003.pdf]

| <b>Journal</b><br>[journal title abbreviation] | <b>Number</b><br>[N] | <b>Proportion</b><br>(%) | <b>5-year IF</b><br>[as per 2018] | <b>Word count limits</b><br>[words] |
|------------------------------------------------|----------------------|--------------------------|-----------------------------------|-------------------------------------|
| Acta Bioeng Biomech                            | 1                    | 0,5                      | 1,112                             | 150-250                             |
| Acta Odontol Scand                             | 3                    | 1,4                      | 1,565                             | 250                                 |
| Am J Dent                                      | 1                    | 0,5                      | 0,720                             | No limit                            |
| Am J Orthod Dentofacial Orthop                 | 2                    | 0,9                      | 1,911                             | 250                                 |
| Angle Orthod                                   | 1                    | 0,5                      | 1,880                             | 250                                 |
| Ann Anat                                       | 2                    | 0,9                      | 2,241                             | No limit                            |
| Biomed Res Int                                 | 3                    | 1,4                      | 2,197                             | 300                                 |
| Br J Oral Maxillofac Surg                      | 2                    | 0,9                      | 1,164                             | 250                                 |
| Clin Implant Dent Relat Res                    | 22                   | 10,4                     | 3,212                             | 150-200                             |
| Clin Oral Implants Res                         | 36                   | 17,0                     | 3,825                             | 250                                 |
| Compend Contin Educ Dent                       | 1                    | 0,5                      | 0                                 | n.a.                                |
| Curr Med Res Opin                              | 1                    | 0,5                      | 2,345                             | 250                                 |
| Eur J Oral Implantol                           | 36                   | 17,0                     | 2,513                             | 250                                 |
| Eur J Orthod                                   | 1                    | 0,5                      | 1,841                             | 330                                 |
| Hua Xi Kou Qiang Yi Xue Za Zhi                 | 2                    | 0,9                      | 0                                 | No limit                            |
| Int J Oral Maxillofac Surg                     | 7                    | 3,3                      | 1,961                             | 300                                 |
| Int J Oral Maxillofac Implants                 | 23                   | 10,8                     | 1,734                             | 350                                 |
| Int J Periodontics Restorative Dent            | 7                    | 3,3                      | 1,228                             | 75-100                              |
| Int J Prosthodont                              | 7                    | 3,3                      | 1,533                             | 350                                 |
| Implant Dent                                   | 5                    | 2,4                      | 1,214                             | 225                                 |
| J Biomater Appl                                | 1                    | 0,5                      | 2,442                             | No limit                            |
| J Bone Miner Res                               | 1                    | 0,5                      | 5,711                             | 300                                 |
| J Clin Periodontol                             | 9                    | 4,2                      | 4,164                             | 200                                 |
| J Craniofac Surg                               | 1                    | 0,5                      | 0,785                             | 200                                 |
| J Dent                                         | 1                    | 0,5                      | 3,280                             | 250                                 |
| J Dent Res                                     | 4                    | 1,9                      | 5,125                             | 300                                 |
| J Oral Implantol                               | 3                    | 1,4                      | 5,125                             | 250                                 |
| J Oral Maxillofac Surg                         | 1                    | 0,5                      | 1,781                             | 300                                 |
| J Oral Rehabil                                 | 3                    | 1,4                      | 2,341                             | 250                                 |
| J Periodontol                                  | 4                    | 1,9                      | 2,768                             | 250                                 |
| J Periodontal Res                              | 1                    | 0,5                      | 2,613                             | 250                                 |
| J Plast Reconstr Aesthet Surg                  | 1                    | 0,5                      | 2,228                             | 250                                 |
| J Prosthodont                                  | 2                    | 0,9                      | 2,636                             | 350                                 |
| Med Oral Patol Oral Cir Bucal                  | 3                    | 1,4                      | 1,284                             | 150-300                             |
| Oral Maxillofac Surg                           | 1                    | 0,5                      | 1,781                             | 300                                 |
| Oxid Med Cell Longev                           | 1                    | 0,5                      | 4,868                             | 200                                 |
| Prog Orthod                                    | 1                    | 0,5                      | 1,381                             | 350                                 |
| Quintessence Int                               | 1                    | 0,5                      | 1,392                             | 250                                 |
| Saudi Med J                                    | 2                    | 0,9                      | 1,055                             | 230                                 |
| Sci Rep                                        | 1                    | 0,5                      | 4,011                             | 200                                 |
| Stomatologia                                   | 1                    | 0,5                      | 0                                 | 250                                 |
| Swed Dent J                                    | 1                    | 0,5                      | 0,818                             | 300                                 |

|                          |            |              |       |         |
|--------------------------|------------|--------------|-------|---------|
| Trials                   | 3          | 1,4          | 1,975 | 350     |
| Vestn Ross Akad Med Nauk | 1          | 0,5          | 0     | 300-500 |
| Vojnosanit Pregl         | 1          | 0,5          | 0,272 | 450     |
| <b>Total</b>             | <b>212</b> | <b>100,0</b> |       |         |

Supplementary table 3: List of journals [N] (%) from which information was extracted for final analysis, 5-year Impact Factor [2018] and word count limits for each journal as per 2019
