# Supplementary material for: Assessment of reporting quality in randomised controlled clinical trial abstracts of dental implantology published from 2014 to 2016
Source: PubMed Central journal article supplement — BMJ Open. 2021 Aug 13;11(8):e045372. doi: 10.1136/bmjopen-2020-045372 (PMC8365792; doi:10.1136/bmjopen-2020-045372), 2021-08-13
Supplement: bmjopen-2020-045372supp004.pdf [file bmjopen-2020-045372supp004.pdf]

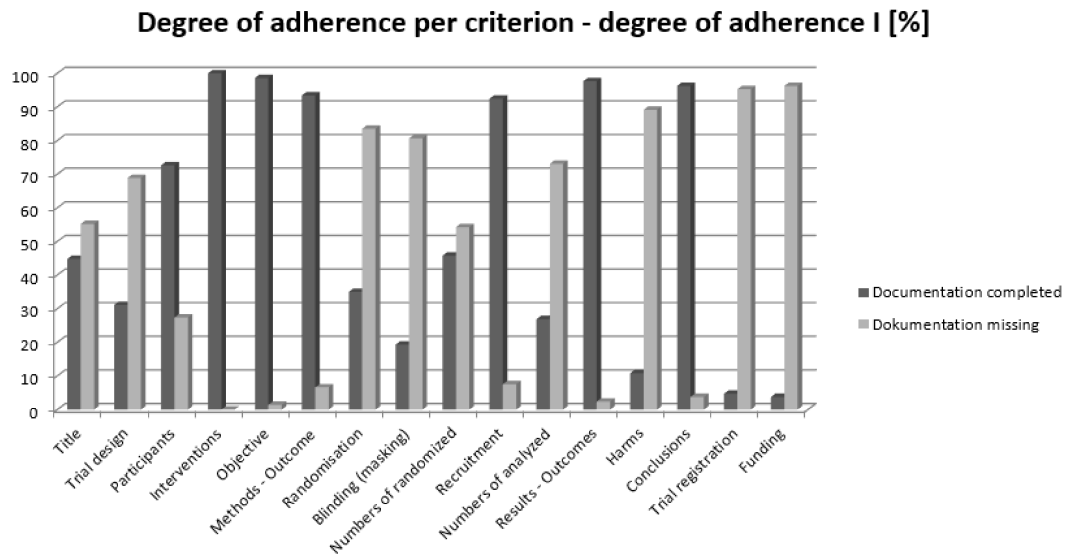

**Supplementary Fig. 1:** Graphical representation of proportional implementation of criteria to facilitate locating the corresponding information in the abstract (degree of adherence I).
