# Supplementary material for: Assessment of reporting quality in randomised controlled clinical trial abstracts of dental implantology published from 2014 to 2016
Source: PubMed Central journal article supplement — BMJ Open. 2021 Aug 13;11(8):e045372. doi: 10.1136/bmjopen-2020-045372 (PMC8365792; doi:10.1136/bmjopen-2020-045372), 2021-08-13
Supplement: bmjopen-2020-045372supp006.pdf [file bmjopen-2020-045372supp006.pdf]

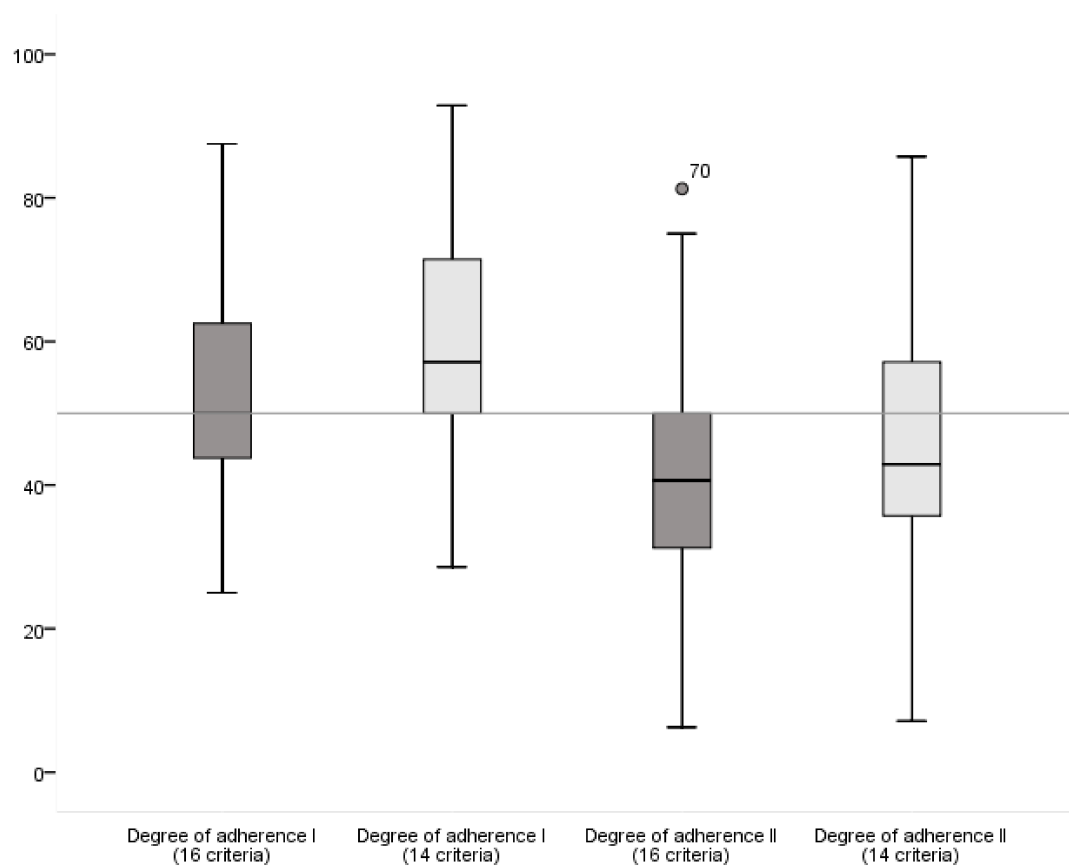

**Supplementary Fig. 3:** Illustration of the degree of adherence per study (%) in a box plot (N=212) as a comparison of data pools with 14 vs. 16 criteria. Degree of adherence I (quantitative implementation), degree of adherence II (qualitative implementation). Evaluation of the reduced data pool was based on 14 criteria (excluded: “registration” and “funding”).
