# Supplementary material for: Assessment of reporting quality in randomised controlled clinical trial abstracts of dental implantology published from 2014 to 2016
Source: PubMed Central journal article supplement — BMJ Open. 2021 Aug 13;11(8):e045372. doi: 10.1136/bmjopen-2020-045372 (PMC8365792; doi:10.1136/bmjopen-2020-045372), 2021-08-13
Supplement: bmjopen-2020-045372supp007.pdf [file bmjopen-2020-045372supp007.pdf]

| Criterion                 | Percentage match | Kappa | <b>*Kappa 0.61 – 1.0</b><br>(essential match and almost perfect match) |
|---------------------------|------------------|-------|------------------------------------------------------------------------|
| <b>Title</b>              | 83%              | 0,677 | *                                                                      |
| <b>Trial design</b>       | 89%              | 0,738 | *                                                                      |
| <b>Participants</b>       | 90%              | 0,744 | *                                                                      |
| <b>Interventions</b>      | 100%             | n.a.  |                                                                        |
| <b>Objective</b>          | 100%             | 0,798 | *                                                                      |
| <b>Outcome</b>            | 91%              | 0,312 |                                                                        |
| <b>Randomisation</b>      | 82%              | 0,318 |                                                                        |
| <b>Blinding (masking)</b> | 92%              | 0,726 | *                                                                      |
| <b>Numbers randomised</b> | 76%              | 0,515 |                                                                        |
| <b>Recruitment</b>        | 85%              | 0,310 |                                                                        |
| <b>Numbers analysed</b>   | 84%              | 0,606 |                                                                        |
| <b>Outcome</b>            | 100%             | 1,000 | *                                                                      |
| <b>Harms</b>              | 62%              | 0,041 |                                                                        |
| <b>Conclusions</b>        | 100%             | 1,000 | *                                                                      |
| <b>Trial registration</b> | 97%              | 0,449 |                                                                        |
| <b>Funding</b>            | 99%              | 0,762 | *                                                                      |

Supplementary table 4: Calculation of Kappa for inter-rater reliability; percentage match between evaluators; Kappa, n.a.= in this case calculation of Kappa was not performed (SPSS) since one evaluator had rated the criterion “intervention” as 1 for all publications; (\*) for criteria which showed an essential match or an almost perfect match between evaluators.
